1  
2  
3  
4  
5  
6  
7  
8  
9  
10  
11  
12  
13  
14  
15  
16  
17  
18  
19  
20  
21  
22  
23  
24  
25  
26  
27  
28  
29  
30  
31  
32

**Stress-responsive Long Non-coding RNA, *hsr $\omega$* , is a genetic modifier of JNK-dependent  
Intrinsic Tumor Suppression in *Drosophila***

Anjali Bajpai<sup>1\*</sup>, Sushmita Kundu<sup>1,2</sup>, Ravi Kant Pandey<sup>1,3</sup>, Bushra Ateeq<sup>1,2</sup>, Subhash C.  
Lakhotia<sup>4</sup>, Pradip Sinha<sup>1,2</sup>

<sup>1</sup>Biological Sciences and Bioengineering, Indian Institute of Technology Kanpur, Kanpur  
208016, India.

<sup>2</sup>Biological Sciences and Bioengineering and The Mehta Family Centre for Engineering in  
Medicine, Indian Institute of Technology Kanpur, Kanpur 208016, India.

<sup>3</sup> Current Address: PierianDx India Pvt Ltd, Chattushringi, Gokhalenagar, Pune411016,  
Maharashtra, India

<sup>4</sup>Cytogenetics Laboratory, Department of Zoology, Banaras Hindu University, Varanasi,  
221005, India.

\* Corresponding author: Anjali Bajpai, [anjalii@iitk.ac.in](mailto:anjalii@iitk.ac.in)

ORCIDID:

A. Bajpai: 0000-0002-5645-2466

B. Ateeq: 0000-0003-4682-9773

S. C. Lakhotia: 0000-0003-1842-8411

P. Sinha: 0000-0002-9202-6050

**Running title:** Perturbations in *hsr $\omega$*  cooperate for epithelial tumor progression

**Key words:** Tumorigenesis, lncRNA, *hsr $\omega$* , stress response, intrinsic tumor suppression,  
*Drosophila*

## 33 Abstract

34 Cells incurring oncogenic hits are often eliminated by cell death via built-in anti-cancer  
35 defense mechanisms, broadly termed as intrinsic tumor suppression (ITS). Identification of  
36 genetic modifiers of ITS-induced cell death would provide better understanding of inherent  
37 tumor-resistance and/or susceptibility. Using a *Drosophila* model of loss of a tumor  
38 suppressor-mediated epithelial tumorigenesis, here we show that perturbations in levels of  
39 stress-responsive nuclear long non-coding RNA (lncRNA) *hsr $\omega$*  gene, promote epithelial  
40 tumorigenesis. Thus, while somatic clones with loss of a tumor suppressor, *Lgl*, are  
41 eliminated by JNK-induced cell death, *lgl* mutant somatic clones induced either in an *hsr $\omega$*   
42 loss-of-function heterozygous genetic background, or upon cell autonomous up- or down-  
43 regulation of *hsr $\omega$*  in *lgl* somatic clones, override the JNK-mediated cell death and progress  
44 to full blown tumors. These tumors display deregulation of Hippo pathway as seen from a  
45 gain of downstream target of inhibition, *Diap1*, an inhibitor of cell death. We finally show  
46 that downregulation in sat III non-coding RNA, a functional analog of *hsr $\omega$*  in humans,  
47 increases sensitivity of cancer cells to cytotoxic stress-induced cell death. lncRNA *hsr $\omega$* ,  
48 therefore, constitutes a novel genetic modifier of ITS in *Drosophila* and of stress-induced cell  
49 death in human cancers.

50 **Summary:** A long non-coding RNA, *hsr $\omega$* , is a novel regulator of JNK-mediated intrinsic  
51 tumor suppression in *Drosophila*.

## 52 Highlights

- 53 • *lgl* clones induced in *hsr $\omega$*  heterozygous loss-of-function genetic background escape  
54 intrinsic tumor suppression (ITS).
- 55 • Perturbation of *hsr $\omega$*  in *lgl* mutant clones, too, leads to their escape from ITS.
- 56 • *hsr $\omega$*  homeostasis required for JNK-dependent ITS.
- 57 • Human sat III, a functional analog of *hsr $\omega$* , confers stress-resistant to human cancer  
58 cells.

59

60

## 61 **Introduction**

62 Chances of developing cancer in one's lifetime are rather high given that millions of cells are  
63 constantly under stress of DNA damage and repair. Despite these odds, most individuals do  
64 not develop cancer [1, 2]. Resistance to cancer is defined by the host's genetic makeup [1]  
65 that governs the systemic tumor surveillance on one end and cell-intrinsic mechanisms of  
66 tumor suppression on the other [2-4]. Intrinsic tumor suppression, ITS, forms the first line of  
67 defense, and is found conserved from *Drosophila* [5, 6] to mammals [7, 8]. Both, systemic  
68 and ITS mechanisms converge to activate cell death effectors in oncogenically mutant cells,  
69 thereby leading to their elimination [9]. Oncogenic hits, therefore, become meaningful for  
70 cancer initiation and progression in genetic backgrounds where endogenous cell death  
71 processes are compromised or turned off; these essentially principles of ITS have been  
72 revealed in *Drosophila* [5, 10, 11]. Uncovering the many genetic players that regulate cell  
73 death would in turn facilitate the understanding of genetics of cancer resistance and/or  
74 susceptibility.

75 One of the critical regulators of cell death is the c-Jun N-terminal kinase (JNK) signaling  
76 pathway [12, 13], which in oncogenically mutated cells is predominantly activated via the  
77 Tumor Necrosis Factor (TNF) or oncogene-induced cellular stress [14] pathways. In  
78 *Drosophila*, epithelial cells with loss of a tumor suppressor, display activation of JNK  
79 signaling via the TNF homolog, Eiger [5, 15] leading to cell death. Thus, cells with loss of  
80 tumor suppressor *lgl*, for instance, escape cell death and undergo neoplastic transformation  
81 when generated in an *H99/+* (heterozygosity for loss of pro-apoptotic genes *reaper*, *grim*,  
82 and *hid*) genetic background [10], or upon gain of inhibitor of apoptosis protein Diap1 [11].  
83 Since oncogenic lesions trigger ITS-induced cell death, genetic inhibition or promotion of  
84 cell death, respectively, represent tumor-promoting or tumor-suppressing conditions. The full  
85 complement of host genetic factors regulating ITS, however, has not been identified yet.

86 Long non-coding RNAs, lncRNAs, constitute a versatile class of molecules that regulate  
87 cytoplasmic and nuclear homeostasis, for instance by formation of nuclear paraspeckles [16],  
88 under normal and stress conditions [17, 18]. Not surprisingly, many of the lncRNAs are  
89 implicated in cancer progression [18, 19], including many stress-responsive satellite non-  
90 coding RNA [20, 21]. However, tumorigenic roles of satellite lncRNAs have not been  
91 identified in *Drosophila*. Here we have looked into the lncRNA gene, the *heat shock RNA*  
92 *omega* or *hsr $\omega$*  [22], which is a ubiquitously-expressed non-coding RNA gene [23-25], and

93 its expression increase several folds upon diverse cell stresses like heat shock, exposure to  
94 amides [26, 27], or anoxia [28].

95 The *hsr $\omega$*  generates multiple nuclear and cytoplasmic transcripts (see schema, **Figure 1A**), of  
96 which the larger nuclear transcripts carry a long stretch of 280bp tandem repeat, which  
97 provides a physical scaffold for assembly of nucleoplasmic omega speckles. These omega  
98 speckles house a variety of RNA-binding and hnRNP (heterogeneous ribonucleo protein)  
99 family of proteins [18, 29] (see schema, **Figure 1A**). Gain or loss of *hsr $\omega$*  therefore disrupts  
100 omega speckle biogenesis [30, 31] and results in increased, but unregulated, cellular  
101 availability of some of the omega-speckle-associated proteins [31, 32]. Significantly, RNAi-  
102 mediated down-regulation of *hsr $\omega$*  transcripts results in elevated levels of free hnRNPs, such  
103 as, Hrb57A, which binds to and stabilizes cytoplasmic proteins, for instance DIAP1, thus  
104 inhibiting the TNF $\alpha$ /Eiger-JNK-triggered apoptotic cell death [32].

105 Given that *hsr $\omega$*  can regulate Tumor Necrosis Factor (TNF $\alpha$ )/JNK signaling-induced cell  
106 death [32] here we have asked if perturbations in the level of *hsr $\omega$*  would affect *lgl* tumor  
107 initiation and progression. Indeed, we found that somatic clones of *lgl* neoplasms generated  
108 in an *hsr $\omega$*  loss-of-function heterozygous genetic background, or those with tumor-  
109 autonomous loss or gain of *hsr $\omega$*  transcripts escape JNK-mediated ITS. Further we show that  
110 downregulation sat III, a functional analog of *hsr $\omega$*  [33, 34], renders cancer cells more  
111 sensitive to cellular stress, such as treatment with cytotoxic drug Doxorubicin. Overall, our  
112 study reveals that homeostasis of lncRNA *hsr $\omega$*  is critical for ITS.

113

## 114 **RESULTS**

115

### 116 ***lgl* clones generated in *hsr $\omega$* loss of function heterozygous genetic background escape 117 ITS-induced elimination**

118

119 *lgl* mutant clones (referred to as *lgl*) generated in a WT (that is *lgl*<sup>+/+</sup>/*lgl*<sup>+/+</sup>, *hsr $\omega$* <sup>+/+</sup>/*hsr $\omega$* <sup>+/+</sup>)  
120 genetic background, display JNK-mediated cell death [10, 11] and are eventually extruded  
121 from the epithelium (**Figure 1B**). These dying cells display increased levels of Caspase and  
122 are largely localized basally (see x-z section in **Figure 1B**). The *lgl* clones in a WT genetic  
123 background, display tell-tale marks of cellular stress, such as increase in ROS, detected using  
124 a ROS-sensitive dye Dihydroethidium (DHE) [35] (**Figure 1C**), perturbed mitochondrial

125 activity, seen using a mitochondria-specific lipophilic dye, MitoTracker (**Figure 1D**), that  
126 marks mitochondria with altered membrane potential [36], and elevated levels of acidic  
127 Lysosomes (**Figure S1A**) detected using LysoTracker. On the other hand, signatures of  
128 cellular stress in *lgl* clones could be reversed by blocking of the JNK signaling through co-  
129 expression of a dominant negative form of *Drosophila* JUN Kinase, *bsk*, (*lgl; UAS-bsk<sup>DN</sup>*  
130 *UAS-GFP*, **Figures 1E, F and S1B, C**). Compared to the *lgl* clones, the *lgl; UAS-bsk<sup>DN</sup>*  
131 clones also displayed improved survival (compare the large-sized *lgl* clones in **Figure 1E, F**  
132 with those in **1B**).

133

134 Further, in view of inhibition of JNK signaling-triggered cell death by down-regulation of the  
135 *hsr $\omega$*  transcripts [32], we sought to see if a genetic background of reduced levels of *hsr $\omega$*   
136 could promote survival of *lgl* clones. We generated GFP-marked *lgl* clones in a heterozygous  
137 near null allele of *hsr $\omega$*  (*hsr $\omega$ <sup>66/+</sup>*) [37, 38] genetic background via somatic recombination in  
138 early second instar larvae. Unlike the *lgl* clones generated in *hsr $\omega$ <sup>+</sup>* (wild type) genetic  
139 background (**Figure 1B**), the *lgl* clones generated in *hsr $\omega$ <sup>66/+</sup>* wing discs survived better, and  
140 displayed significant increase in clone size (**Figure 2A, B**). Further, 31% (n=32) of the *lgl;*  
141 *hsr $\omega$ <sup>66/+</sup>* clones displayed neoplastic transformation by day five of their induction, as seen by  
142 their disrupted cyto-architecture, ascertained using F-Actin (**Figure 2A**). The neoplastically  
143 transformed *lgl; hsr $\omega$ <sup>66/+</sup>* clones exhibited large, dispersed nuclei (**Figure 2A**), a  
144 characteristic feature of neoplastically transformed cells and displayed enhanced levels of  
145 phospho-Histone 3 (**Figure 2C**) indicative of their increased proliferation. Notably, these  
146 clones also exhibited elevated levels of Matrix Metalloproteinases (MMP) (**Figure 2D**), a  
147 signature of their invasive transformation [10]. In agreement, on day 5 of their induction we  
148 observed GFP-marked *lgl* clonal cells in tracheal tubes and fat body (**Figures 1E-F, S1D**), far  
149 away from their site of induction in the imaginal discs, in 30% (n=23) of *lgl; hsr $\omega$ <sup>66/+</sup>* tumor  
150 bearing larvae. Thus, overall, *hsr $\omega$ <sup>66/+</sup>* genetics background allowed better survival of *lgl*  
151 clones and their neoplastic transformation when compared to WT (*hsr $\omega$ <sup>+</sup>*) genetic  
152 background, (**Figure 2G**).

153

#### 154 **Cell autonomous loss of *hsr $\omega$* lncRNA drives *lgl* neoplasia in the wing epithelium**

155 The survival of *lgl* clones in *hsr $\omega$ <sup>66/+</sup>* wing discs led us to further explore the effect of cell  
156 autonomous loss of *hsr $\omega$*  in *lgl* clones. We down-regulated *hsr $\omega$*  transcripts in *lgl* clones by

157 expressing the *UAS-hsrw RNAi* transgene that targets the 280 bp tandem repeats of the *hsrw*  
158 nuclear transcripts (**Figure 1A**) and results in approximately 57% reduction in levels of the  
159 *hsrw* nuclear RNA [32]. The *lgl UAS-hsrw RNAi* clones, generated using the MARCM  
160 technique [39], displayed improved cell survival (**Figure 3A, B**) compared to the *lgl* clones in  
161 *hsrw*<sup>+</sup> genetic background (**Figure 1B**). Further, approximately 32% (n=28) *lgl UAS-hsrw*  
162 *RNAi* clones underwent neoplastic transformation by day five of clone induction (**Figure**  
163 **3A**), and exhibited large dispersed nuclei (magnified image in **Figure 3A**), a signature of  
164 their transformation. Improved survival of *lgl UAS-hsrw RNAi* pointed to decrease in cell  
165 death. Indeed we observed increase in expression of the Hippo target and Inhibitor of  
166 Apoptosis, *Diap1* in *lgl-hsrw RNAi* clones as visualized by *Diap1-lacZ* reporter [40] (**Figure**  
167 **3C**). Further, *lgl UAS-hsrw RNAi* clones displayed an increase in levels of MMP (**Figure 3D**)  
168 pointing to basement membrane break down and tumor progression [10].

169

170 Consistent with the fact that *hsrw*-dependent omega speckle formation is regulated by the  
171 ISWI chromatin remodeling complex [41], we found that down-regulation of ISWI through  
172 *RNAi* also promotes neoplastic transformation of *lgl* clones (*lgl UAS-ISWI RNAi*, **Figure 3E**).  
173 Overall, down-regulation of *hsrw* activity either by cell autonomous *RNAi* (**Figure 3F**) or in  
174 *hsrw*<sup>66/+</sup> genetic background (**Figure 2**), protected *lgl* clones from JNK-mediated  
175 elimination. We however, note that, while cell-autonomous down regulation of JNK arrests  
176 both the cell death and neoplastic transformation of *lgl* clones (**Figure 1E, F**, also see [42]),  
177 loss of *hsrw* in contrast blocks only cell death but not the neoplastic transformation of *lgl*.  
178 Further studies are needed to understand how *hsrw* selectively regulates the two arms of  
179 JNK signaling, namely cell death and neoplastic transformation in the context of  
180 tumorigenesis.

### 181 **Cell autonomous gain of *hsrw* lncRNA also drives *lgl* neoplasia**

182 Since loss of *hsrw* in *lgl* cells facilitated their escape from cell death and led them undergo  
183 neoplastic transformation, we expected that gain of *hsrw* activity would aggravate cell death  
184 in *lgl* mutant clones. Earlier studies [32] also reported that gain of *hsrw* activity enhances  
185 JNK and TNF $\alpha$  induced cell death. We, therefore, drove an *UAS-hsrw* transgene in *lgl*  
186 somatic clones (*lgl UAS-hsrw*). The *UAS-hsrw* transgene expresses the ~10kb nuclear *hsrw*  
187 transcript under a Gal4-responsive UAS element [43]. Surprisingly, we noted that the *lgl*  
188 *UAS-hsrw* clones too survived well, with a marked increase in clone size (**Figure 3G, H**)

189 compared to *lgl* clones in (*hsr $\omega$* <sup>+</sup> genetic background (see **Figure 1D**). Some of the *lgl* UAS-  
190 *hsr $\omega$*  clones (~15%, n=23 clones) underwent neoplastic transformation (**Figures 3G**) by day  
191 five of clone induction and also exhibited large dispersed nuclei (**Figure 3G**). The x-z section  
192 along the clone (marked by dotted line, **Figure 3G**) clearly displayed the disrupted F-actin in  
193 the GFP-positive clone area, when compared to the orderly structured epithelia in the  
194 adjoining *lgl*<sup>+</sup> regions.

195 Similar results were found when an *hsr $\omega$*  over-expressing *EP3037* allele, which carries as  
196 UAS-containing EP transposon in the *hsr $\omega$*  promoter [32], was expressed in the MARCM *lgl*  
197 clones (**Figure S2**). Thus, cell autonomous gain of *hsr $\omega$*  levels also facilitated neoplastic  
198 transformation of *lgl* clonal cells.

199

#### 200 ***hsr $\omega$* -mediated tumor cooperation does not suffice to override developmentally-** 201 **regulated ITS**

202

203 The rescue and subsequent transformation of *lgl* clones with simultaneous perturbations in  
204 *hsr $\omega$*  transcript levels was largely limited to the proximal wing, since the *lgl* clones generated  
205 in the distal wing continued to undergo apoptosis, as reflected in the elevated levels of  
206 Caspase in such clones (marked by arrow in **Figure 4A-C**). Such disparities in neoplastic  
207 propensities of *lgl* clones are consistent with earlier reports [10, 44, 45], and could be  
208 attributed to the underlying developmental programs [10] or to tissue intrinsic local  
209 cytoarchitecture [45].

210

211 The *lgl* clones induced in the tumor resistant distal wing region displaying cell autonomous  
212 down-regulation of *hsr $\omega$*  activity or those induced in a *hsr $\omega$* <sup>66/+</sup> heterozygous genetic  
213 background continued to display signatures of cellular stress, such as increased levels of ROS  
214 (**Figure 4E**), perturbed mitochondrial activity (**Figure 4F**) and increase in levels of acidic  
215 lysosomes (**Figure 4H**). We also noted breakdown of lipid droplets (LDs) in the *lgl* clones in  
216 the distal wing (**Figure 4G**) detected using the fluorescent lipophilic dye Nile red; breakdown  
217 of LDs can add to a buildup of ROS owing to the loss of its cytoprotective role against  
218 reactive oxygen species [46].

219



220 When compared to the distal wing, *lgl* clones with perturbed *hsr $\omega$*  levels in the proximal  
221 wing display much less Caspase (**Figure 4A-C**, inset). Strikingly though, clones in advanced  
222 stages of neoplastic transformation begin to display cell death particularly in cells along the  
223 clone boundary (**Figure 4I**), and also in wild type cells abutting the clones (**Figure 4J**); while  
224 negligible cell death was seen within the transformed clones (**Figure 4I, J**).  
225 Taken together, perturbations in *hsr $\omega$*  rescues *lgl* cells from cell death and elimination,  
226 consequently leading to their neoplastic transformation, albeit in developmental domain-  
227 specific manner (**Figure 4D**).

228

### 229 **Down- or up-regulation of *hsr $\omega$* activity results in some common transcriptional** 230 **changes that could promote cell survival**

231

232 Tumor cooperation by loss (**Figure 2**) as well as by gain (**Figure 3**) of *hsr $\omega$*  activity in the  
233 proximal wing domain was surprising. It is notable that a gain or loss of *hsr $\omega$*  activity has  
234 also been reported to similarly enhance the activated Ras-driven aberrant differentiation of  
235 photoreceptors and accompanying pupal lethality [47]. In order to understand reasons for  
236 such paradoxical results, we re-examined the earlier published transcriptomes [47] of eye disc  
237 epithelium displaying gain (*EP3037*) or loss (*UAS-*hsr $\omega$*  RNAi*) of *hsr $\omega$*  activity to see if loss  
238 and gain of *hsr $\omega$*  activity have some common effects on genes associated with cell death and  
239 cell stress pathways. We indeed found a number of genes that were commonly up or down-  
240 regulated under the two conditions (**Figure S3A**). These included genes like *Death-*  
241 *associated protein kinase related (Drak)*, the effector Caspase *hid*, and *Drosophila* ortholog  
242 of MAP4K3, *happyhour (hppy)*—an activator of JNK-mediated apoptosis [48] (**Figure 5A**).  
243 We also noted downregulation of stress-induced cell death regulators like Phosphodiesterase-  
244 8 (*Pde8*) [49] and *scyl* [50] (**Figure 5B**) upon either gain or loss of *hsr $\omega$* . Further, several  
245 members of the Hippo signaling pathway—a key negative regulator of organ growth [51]—  
246 such as, *wts*, *mer*, *kibra* and *tao*, were also commonly perturbed upon either gain or loss of  
247 *hsr $\omega$*  (**Figure 5C**).

248 Since the nuclear *hsr $\omega$* -associated omega speckles regulate the dynamic availability of  
249 hnRNPs like HRB57A, HRB87F, Squid, Hrp38 and Hrp59 [31], we looked at the  
250 transcriptional status of their respective target genes in the earlier published transcriptome  
251 data [47]. Gene Set Enrichment Analysis (GSEA) [52], clearly displayed common  
252 downregulation of many of the genes that interact with these hnRNPs upon either loss  
253 (**Figures 5D** upper panel, and **S3B**) or gain (**Figure 5D** lower panel and **S3C**) of *hsr $\omega$*



254 activity. We note that genes such as cell death regulators *psn* and *Rbf*, and growth regulatory  
255 TOR pathway members like *gigas*, *rictor*, *S6K* (**Figure S3D**) are associated with one or more  
256 of the *hsr $\omega$* -linked hnRNPs, and therefore, as expected, their transcripts are affected upon  
257 perturbations in *hsr $\omega$*  levels.

### 258 **Pro-tumorigenic role of satellite III repeats in human cancer**

259  
260 Following our above observation that perturbations in *hsr $\omega$*  transcript levels help the survival  
261 of *lgl* mutant cells, we also examined if sat III repeats, the functional equivalent of *hsr $\omega$*  in  
262 humans [33] also affect cancer cells. The sat III repeats localize to the peri-centromeric  
263 region of human chromosome 9q [53] and undergo enhanced transcription following diverse  
264 cellular stress conditions [53, 54]. sat III transcripts together with Heat Shock Factor 1  
265 (HSF1) and several other RNA-binding proteins generate nuclear stress bodies (nSBs), which  
266 in some ways parallel the accumulation of the various omega speckles associated proteins  
267 exclusively at the *hsr $\omega$*  locus under cell stress conditions [29]. In view of the above parallels  
268 between *hsr $\omega$*  and sat III transcripts and since cancer cells are under continuous physiological  
269 stress, we examined status of sat III transcripts in a panel of cancer cell lines, namely,  
270 Prostate (22RV1, PC3, VCaP, LNCaP), Breast (MCF7, MDA-MB-231) and cervical (HeLa)  
271 cancer cell lines. Interestingly, we found elevated levels of sat III transcripts in LNCaP,  
272 MDA-MB-231, and HeLa cells (**Figure 6A**). We next examined the stress induced changes  
273 in sat III transcripts in cell lines with low (PC3) or high (MDA-MB-231 and HeLa)  
274 endogenous sat III levels. We used different physiological stress conditions like oxidative  
275 stress, (250 $\mu$ M of H<sub>2</sub>O<sub>2</sub>), anticancer drug treatment (Doxorubicin at 2.5  $\mu$ M), or one hour  
276 heat-shock at 42°C. There was a significant increase in sat III levels under elevated oxidative  
277 stress (250 $\mu$ M H<sub>2</sub>O<sub>2</sub>) conditions in all the three cancer cell lines (**Figure 6B-D**), whereas a  
278 low to high gain in sat III transcript levels was seen following treatment with Doxorubicin  
279 (**Figure 6B-D**) or heat shock (**Figure 6B-D**) in all these cancer cell lines, albeit to different  
280 extent. In parallel, we observed signatures of cellular stress, such as increase in the levels of  
281 ROS, mitochondrial activity, acidic lysosome, and concomitant elevated cell death, in MDA-  
282 MB-231 cancer cell line following heat shock (42°C for 1 hour) (**Figure 6E-I**) when  
283 compared to cells without heat shock (**Figure S4A-E**).

284 We then further asked if perturbations in sat III levels would affect the survival of cancer  
285 cells under stress, such as treatment with Doxorubicin, a chemotherapeutic drug. We used

286 anti-sense oligos [54] to downregulate sat III in PC3 cells that display low levels of  
287 endogenous sat III (**Figure 6A**) along with moderate but robust increase upon Doxorubicin  
288 treatment (**Figure 6D**). Cell viability assay using PC3 cells transfected with anti-sense oligos  
289 in the presence or absence of Doxorubicin, showed that knocking down Sat3 (~30%  
290 reduction, **Figure S4F**) results in reduced cell viability of PC3 compared to control cells  
291 when treated with Doxorubicin (**Figure 6J**); indicating that ablating expression of Sat-III in  
292 cancer cells further potentiate the cytotoxic effect of chemotherapeutic drug.

293

## 294 **DISCUSSION**

295 In this study we uncover the role of stress-responsive *hsr $\omega$*  lncRNAs in ITS. We show that  
296 cells with loss of tumor suppressor, when generated in an *hsr $\omega$ <sup>66</sup>* heterozygous genetic  
297 background; or upon cell-autonomous gain or loss of *hsr $\omega$*  activity evade JNK-induced  
298 elimination and undergo neoplastic transformation (**Figure 7**).

### 299 ***hsr $\omega$* is part of the host genetic repertoire of ITS**

300 Loss of a tumor suppressor gene in *Drosophila* triggers TNF/Eiger-induced JNK signaling  
301 resulting in cell death [5], which is also seen to be activated during cell-competition, a tissue  
302 surveillance mechanism to rid physiologically unfit cells [4]. Out competed cells display  
303 buildup of cellular stress such as increased proteotoxicity [55], or increase in redox regulator,  
304 Nrf2 [56]. Thus, buildup of cell stress and activation of stress response genes appear to be a  
305 forerunner of tissue surveillance and, in turn, ITS. Our study presents yet another stress-  
306 response gene, namely the lncRNA *hsr $\omega$* , whose perturbation alters the fate of mutant cells,  
307 which are otherwise destined to die. Thus, *hsr $\omega$* , that undergoes exaggerated transcription to  
308 confer stress-resistance to cells, also helps survival of oncogenically mutant cell by their gain  
309 and, ironically also, via loss of activity. The *hsr $\omega$*  homeostasis, therefore, appears to be  
310 critical for elimination of oncogenic cells. We also note that *hsr $\omega$*  drives transformation of *lgl*  
311 clonal cells only in the proximal wing, which is in agreement with earlier observations [10,  
312 44] that compared to the distal segment, the proximal wing allows for ready transformation.  
313 Thus, developmental domains display different thresholds of ITS-triggered JNK-driven  
314 elimination. It is possible that *hsr $\omega$*  could regulate JNK signaling at multiple levels, besides  
315 stabilizing DIAP1, to counteract JNK-driven cell death. For instance, *hsr $\omega$*  could modulate  
316 proteasomal degradation of JNK pathway members [57] by regulating Cullin family of  
317 proteins [58], which were found to be affected by changes in *hsr $\omega$*  transcripts [47].

318 Ascertaining how *hsr $\omega$*  regulates JNK-signaling would provide a better resolution of its role  
319 in ITS.

### 320 **Cell autonomous perturbations in *hsr $\omega$* affect multiple processes linked to tumor** 321 **progression**

322 One of the striking outcomes of *hsr $\omega$*  perturbations seen in this study was that its gain as well  
323 as loss was found to inhibit ITS-driven elimination of *lgl* cells. While this may appear as  
324 paradoxical, common outcome of gain or loss of *hsr $\omega$*  [47] could be due to disruption of  
325 omega speckles in either case [29, 31, 41], which dynamically regulate the cellular  
326 availability of various hnRNPs. This is further supported by neoplastic transformation of *lgl*  
327 cells upon down regulation of ISWI which is known to disrupt biogenesis of omega speckles  
328 [31, 41]. Disruption of hnRNPs, could in turn impact tumorigenesis via affecting multiple  
329 cellular processes. For instance, loss of *hsr $\omega$*  could affect survival of tumor cells by  
330 regulating telomere maintenance via hnRNP Hrp36 [59], or affect the metabolism of mutant  
331 cells by regulating levels of triglycerides via hnRNPs like Hrp59 and Hrb87F [60]. Further,  
332 loss of junction protein, such as Cadherin via decrease in Hrp38 levels [61] could accelerate  
333 tumor growth and invasion. Other common targets of hnRNPs, identified here through the  
334 gene-enrichment analysis include important regulators of cell death, such as Hippo and  
335 mTOR pathways, all of which can promote survival of tumorigenic cells.

336 Given the possible role of *hsr $\omega$*  in ITS as seen in this study, earlier report [38] of *hsr $\omega$* <sup>66</sup>  
337 mutant larvae phenocopying tumor bearing *lgl* homozygous larvae, can be viewed in the light  
338 of *hsr $\omega$*  facilitating survival of cells with loss of *lgl*, since a substantial down-regulation in  
339 expression of *lgl* was observed in cells with simultaneous loss of *hsr $\omega$*  and gain of Hsp83, as  
340 seen by Ray et al., [38]

341

### 342 **sat III a stress-response player in human cancer cells**

343 ITS is triggered as an early response to tumor initiation, often resulting in elimination of  
344 oncogenic cells at its inception. It is likely that while in relatively simple organism, such as in  
345 *Drosophila*, stress-response gene, *hsr $\omega$* , is co-opted for an ITS function, in the course of  
346 evolution, the functional analog of *hsr $\omega$* , the sat III [33], retained its stress-response role and  
347 simultaneously diverged to provide a pro-tumorigenic role in mammals. sat III transcripts  
348 are also perturbed in a variety of human cancer cell lines and similar to the involvement of

349 *hsr $\omega$*  in biogenesis of omega speckles and their aggregation during stress, the sat III  
350 transcripts also form nuclear stress bodies and act as a sink for various RNA processing and  
351 heat shock factors [18, 33]. Indeed, several other studies [20, 62, 63] have reported  
352 association between perturbations of satellite non-coding RNAs and cancer. Similar to  
353 association of *hsr $\omega$*  with hnRNPs, sat III associates with Fus and TDP-43 whose aberrant  
354 distribution is seen in cancer cells [34, 64] and with paraspeckle associated *Neat1* lncRNA or  
355 with *Xist* lncRNA in breast and cervical cancers, respectively [65, 66]. Thus, while sat III is  
356 implicated in cancer cells it would be indeed interesting to look at its role during early stages  
357 of tumor initiation, as suggested in this study.

### 358 **Acknowledgement**

359 We thank S. Ganesh, Indian Institute of Technology, Kanpur, for gift of sat III anti-sense  
360 oligos. We acknowledge Bloomington Drosophila Stock Centre (Indiana University) for fly  
361 stocks; and Developmental Studies Hybridoma Bank for antibodies; This work was supported  
362 by the Wellcome Trust-DBT India Alliance (IA/E/13/1/501271) to A.B.; and the Department  
363 of Biotechnology, Ministry of Science and Technology (DBT/PR14716/BRB/10/876/2011)  
364 to P.S. SCL is supported by the Department of Biotechnology, Ministry of Science and  
365 Technology (BT/PR32126/BRB/10/1775/2019) and the Science & Engineering Research  
366 Board, Govt. of India, as a Distinguished Fellow (SB/DF/009/2019).

367

### 368 **Material and Methods**

369 Fly stocks were maintained at 25<sup>0</sup>C on standard fly food containing corn powder, yeast, and  
370 sugar.

371 The following transgenic lines were used in this study:

372 *w; l(2)gl<sup>4</sup> FRT40A/CyO; +/+* (#36289, Bloomington Drosophila Stock Centre, Indiana  
373 University)

374 *w/w; +/+; EP3037/EP3037* [32]

375 *w/w; UAS-hsr $\omega$ /UAS-hsr $\omega$*  [43]

376 *w/w; UAS-hsr $\omega$  RNAi(2x)/ UAS-hsr $\omega$  RNAi(2x); +/+* [32]

377 *w/w; +/+; hsr $\omega$ <sup>66</sup>/ TM6B* [37])

378 *y w hs-flp tubGal4 UAS-GFP/ y w hs-flp tubGal4 UAS-GFP; tub-Gal80 FRT40A/Cy-O; +/+*

379 (The line was generated using individual lines from Bloomington Drosophila Stock Centre,  
380 Indiana University)

381

382 **The genotypes of the flies used in the study**

383 *y w hs-flp tub-Gal4 UAS-GFP/+; lgl<sup>4</sup> FRT40A/tub-Gal80 FRT40A; +/+*

384 *y w hs-flp tub-Gal4 UAS-GFP/+; lgl<sup>4</sup>UAS-hsr $\omega$  RNAi (2X) FRT40A/tub-Gal80 FRT40A; +/+*

385 *y w hs -flp tub-Gal4 UAS-GFP/+; lgl<sup>4</sup>UAS-hsr $\omega$  RNAi (2X) FRT40A/tub-Gal80 FRT40A;*

386 *Diap1-LacZ/+*

387 *y w hs -flp tub-Gal4 UAS-GFP/+; lgl<sup>4</sup>UAS-ISWI RNAi FRT40A/tub-Gal80 FRT40A; +/+*

388 *y w hs -flp tub-Gal4 UAS-GFP/+; lgl<sup>4</sup> FRT40A/Gal80<sup>ts</sup> FRT40A; hsr $\omega$ <sup>66</sup>/+*

389 *y w hs -flp tub-Gal4 UAS-GFP/+; lgl<sup>4</sup> UAS-hsr $\omega$  FRT40A/tub-Gal80*

390 *y w hs -flp tub-Gal4 UAS-GFP/+; lgl<sup>4</sup>UAS-bsk<sup>DN</sup> FRT40A/tub-Gal80*

391 *y w hs -flp tub-Gal4 UAS-GFP/+; lgl<sup>4</sup>FRT40A/tub-Gal80; EP3037/+*

392

393

394 **Antibodies used in the study**

395

396 We used the following antibodies: anti-Caspase-3, raised in Rabbit, at a dilution of 1:500  
397 (MERK/Sigma Aldrich, #C8487). Anti-phospho Histone-3 (pSer<sup>10</sup>), raised in Rabbit, used at  
398 1:500 dilution (MERK /Sigma Aldrich # H0412), anti-  $\beta$  Galactosidase Antibody, raised in  
399 mouse, used at 1:200 dilution (MERK/Sigma Aldrich, #G6282). To detect MMP, we used a  
400 cocktail of monoclonal antibodies from DSHB (Developmental Studies Hybridoma Bank,  
401 University of Iowa, Iowa City): 3AB4, 3B8D12, 5H7B11 and 3B8D12, raised in Mouse, at a  
402 final dilution of 1:300. Nuclear labeling was carried out using TO-PRO-3 (Invitrogen,  
403 #T3605) at a dilution of 1:1000. Corticular F-Actin was labeled using Phalloidin-633  
404 (#A22284, Invitrogen). For Secondary antibodies, we used Goat anti-mouse (#A32727)- and  
405 Goat anti-Rabbit (#A32732)- Alexa Fluor -555 (Invitrogen).

406

407 **GFP-labeled somatic clone induction**

408 All somatic clones (pertaining to Figures 1, 2, 3, 4 and 5; barring Figure 2 (see below)) were  
409 generated using the MARCM (Mosaic analysis with a repressible cell marker) technique [39]  
410 to allow their uniform comparison. MARCM technique allows one to generate GFP marked  
411 clones using somatic recombination via heat shock driven-Flp/FRT, and allows simultaneous  
412 activation of a transgene under UAS/Gal4 control, selectively in the somatic clone. Selective  
413 activation of UAS-transgene in the clones is due to absence of *tubulin*-driven Gal80 (which  
414 represses Gal4) within the clone, while Gal80 is active outside the clone area. Clones were

415 induced by giving heat-shock to synchronized early second instar larvae (48 hours after egg  
416 laying) at 37°C for 30 minutes. Larvae were maintained at 25°C prior to and after heat shock,  
417 till they were dissected. The induced homozygous *lgl<sup>f</sup>* clones are referred to here as *lgl*  
418 clones.

419

### 420 **Immuno-fluorescence staining and microscopy**

421

422 Briefly, larvae of desired genotypes were dissected in 1x Phosphate Buffer Saline (PBS), and  
423 imaginal discs were fixed in 4% paraformaldehyde in 1x PBS containing 0.02 % triton, and  
424 incubated in primary antibody overnight at 4°C, followed by incubation with fluorescently  
425 tagged secondary antibodies for two hours at room, and counterstained with TO-PRO-3 or  
426 Phalloidin-555. Mounted using Vectashield anti-fade mounting medium (Vector Laboratories,  
427 H-1000). Images were acquired with Leica-SP5 confocal microscope, and processed using Leica  
428 confocal software-LAS AF. Images were acquired using 40x or 20x objectives. Images of GFP-  
429 marked *lgl;hsr<sup>ω66</sup>/+* tumor bearing larvae were acquired with a Leica M205FA stereomicroscope  
430 set up under epi-fluorescent illumination (excitation filter 480 nm). All images were assembled  
431 using Adobe Photoshop CS5 software.

432

### 433 **MitoTracker and LysoTracker**

434

435 We used MitoTracker™ Red CMXRos (#M22425, Thermo-Fisher Scientific/Invitrogen), a  
436 cell-permeant, red-fluorescent dye that stains mitochondria in live cells. Its accumulation is  
437 dependent upon the mitochondrial membrane potential. Further, we used LysoTracker® Red  
438 DND-99 dye (with red-fluorescence, #L7528) for labeling and tracking acidic organelles in  
439 unfixed larval wing discs. Briefly, larvae of desired genotype were gently rinsed and  
440 dissected in 1x PBS to remove tissues like fat body, gut etc. The flipped larvae were  
441 incubated in freshly prepared 500 nM of MitoTracker dye (in 1X PBS) or 500nM of  
442 LysoTracker (in 1X PBS) at room temperature in the dark for 15 minutes, followed by  
443 thorough rinse in 1x PBS. Unfixed wing discs were mounted in anti-fade-containing  
444 Vectashield (Vector Laboratories, #H-1000), and images were acquired immediately using  
445 Leica-SP5 confocal microscope and processed using Leica confocal software-LAS AF and  
446 assembled using AdobePhotoshop.

447

### 448 **ROS staining using DHE**



449 We used Dihydroethidium (#D11347, Invitrogen), a free radical sensitive dye to detect  
450 ROS levels in live larval tissues. The dye gets oxidized by free radicals and fluoresce red.  
451 Briefly, larvae of desired genotype were washed and dissected in 1xPBS. After removal of  
452 fat body, gut etc, the flipped larvae were incubated in freshly made 1:1000 DHE at room  
453 temperature in the dark for 15 minutes. The wing imaginal discs were subsequently  
454 thoroughly rinsed in 1XPBS, mounted in anti-fade containing Vectashield (Vector  
455 Laboratories, #H-1000), and images were acquired with Leica-SP5 confocal microscope and  
456 processed using Leica confocal software-LAS AF and AdobePhotoshop.

457

#### 458 **Heatmaps and Gene Set Enrichment Analysis (GSEA):**

459 Preprocessed RNAseq data was obtained from Ray et al., [47]. The FPKM values of  
460 individual genes were used as inputs to generate heat maps using Heatmapper [67], a web-  
461 based tool for generation of heat maps. The Heatmaps were generated using row clustering  
462 using Average linkage and Pearson distance measure.

463 Gene Set Enrichment Analysis (GSEA) is a statistical tool that provides a quantitative  
464 measure of the enrichment of predefined set of genes between two phenotypes being  
465 compared. Using running sum statistics, a normalized enrichment score (NES) is calculated.  
466 The NES is a positive value if gene set is positively correlated with the phenotype under  
467 study (such as *hsr $\omega$*  mis-expression genotypes versus control), and is therefore considered  
468 enriched in the former. Pre-defined gene sets for hnRNP-(Squid, HRB57A, HRB87F, Hrp59  
469 and Hrp38) interacting genes were obtained from BIOGRID. GSEA analyses were carried  
470 out using the following parameters: genes were ranked based on comparison of phenotypes:  
471 *hsr $\omega$*  versus control using signal-to-noise metric. The enrichment score was calculated using  
472 weighted running sum statistics. Gene-based permutation (n =1,000) was used to compute the  
473 nominal P value and FDR was computed to correct for multiple-hypothesis testing.

#### 474 **Cancer cell lines, culture conditions and treatments:**

475 22RV1, PC3, VCaP, LNCaP (Prostate cancer cell lines), MCF7, MDA-MB-231 (Breast  
476 cancer cell lines) and HeLa (Cervical cancer cell line) were obtained from American Type  
477 Culture Collection (ATCC) and were cultured as per the ATCC recommended guidelines.  
478 Briefly, the cells were cultured in growth medium supplemented with 10% fetal bovine serum  
479 (FBS) and 0.5% Penicillin-Streptomycin (Gibco, Thermo-Fisher Scientific), in cell culture



480 incubator (Thermo Fisher Scientific) supplied with 5% CO<sub>2</sub> at 37°C. For the heat-shock  
481 treatment, cells were grown in 6-well culture dishes and incubated at 42°C for 1 hour and then  
482 at 37°C for 1 hour for recovery. For oxidative stress, cells were treated with 250µM H<sub>2</sub>O<sub>2</sub> for  
483 18 hours. For anticancer drug induced stress, cells were treated with 2.5µM Doxorubicin for  
484 18 hours.

#### 485 **RNA isolation and Quantitative PCR (qPCR):**

486 The total RNA was extracted using RNAiso Plus (Takara) and 1µg of total RNA was reverse  
487 transcribed into cDNA using First Strand cDNA synthesis kit (PureGene) according to the  
488 manufacturer's protocol. Quantitative PCR (qPCR) was performed using cDNA template,  
489 Sat3\_FP: TATGAATTCAATCAACCCGAGTGCAATCGAA, Sat3\_RP:  
490 TATGGATCCTTCCATTCCATTCTGTACTCG [54]; GAPDH\_FP:  
491 TGCACCACCAACTGCTTAGC, GAPDH\_RP: GGCATGGACTGTGGTCATGAG primer  
492 sets and SYBR Green PCR Master-Mix (PureGene) on the QuantStudio 5 Real-Time PCR  
493 System (Applied Biosystems). Relative Sat3 expression was calculated for each sample by  
494  $\Delta\Delta C_T$  method. Two-tailed unpaired Student's t-test was applied to determine the statistical  
495 significance for independent samples \*P≤ 0.05 and \*\*P≤ 0.001. Error bars represent mean ±  
496 SEM.

#### 497 **Cell viability assay:**

498 Cell viability assay using PC3 cell line was performed by plating 3000 cells per well in 96-  
499 well plate. After 24 hours, cells were treated with 5µM Doxorubicin against DMSO control  
500 and after 24 hours, cells were transfected with sat III-antisense constructs along with  
501 polyethylenimine (PEI) cellular transfection reagent ( CAT# 23966-1, Polyethylenimine,  
502 Linear, MW 25000 (6µg/ml)). Cell viability was determined after 48 hours of the drug  
503 treatment following incubation with the Cell viability reagent-Resazurin (Cayman), followed  
504 by colorimetric assay as per manufacturer's protocol. Two-way ANOVA test was used to  
505 determine statistical significance for independent samples \*P<0.05, \*\*P<0.001. Error bars  
506 represents ±SEM.

507

## 508 FIGURE LEGENDS

509 **Figure 1. *lgl* mutant cells display cellular stress.** (A) Organization of the *hsr $\omega$*  gene (left  
510 top) and its multiple transcripts (RA-RF, left bottom); the three long nuclear transcripts (RB,  
511 RF, RG), containing the 280bp tandem repeats, organize the omega speckles in association  
512 with diverse hnRNPs and other RNA-binding proteins [18]. As shown on right, the omega  
513 speckles, are nucleoplasmic in unstressed cells but in stressed cells, all the omega speckle  
514 associated proteins accumulate at the actively transcribing *hsr $\omega$*  gene locus at 93D [22]. (B-  
515 D) *lgl* somatic clones (*lgl UAS-GFP*, green) in wild type (WT) genetic background, display  
516 cell death (Caspase, red, arrow, B). Dying cells are basally extruded as seen by their  
517 enrichment in basal optical section (also see x-z section B', arrow). The clones display intact  
518 F-Actin architecture (grey); *lgl UAS-GFP* clones (green) display elevated levels of ROS,  
519 (DHE, red, C) and MitoTracker staining, a lipophilic dye that reflects mitochondria with  
520 altered membrane potential (red, D). Also note elevated DHE (C) and MitoTracker staining  
521 (D) outside clone area (arrows). Areas marked by yellow boxes in C and D are magnified in  
522 C' and D', respectively. (E-F) *lgl* somatic clones expressing dominant negative form of  
523 *Drosophila* JNK (*lgl UAS-bsk<sup>DN</sup>UAS-GFP*, green), do not display elevated ROS (DHE, red,  
524 E) or enhanced mitochondrial activity (MitoTracker, Red, F). Scale bars represent 100  $\mu$ m.

525

526 **Figure 2. Neoplastic transformation of *lgl* clones in an *hsr $\omega$*  heterozygous genetic**  
527 **background:** (A) *lgl* clones (green) in *hsr $\omega$ <sup>66/+</sup>* genetic background (*lgl UAS-GFP*;  
528 *hsr $\omega$ <sup>66/+</sup>*) undergo neoplastic transformation, as seen by disrupted F-Actin (grey) and large  
529 dispersed nuclei (green, arrows). (B) Box plot displaying significant increase in size of *lgl*;  
530 *hsr $\omega$ <sup>66/+</sup>* somatic clones generated in *hsr $\omega$ <sup>66/+</sup>* genetic background when compared to *lgl*  
531 clones in *hsr $\omega$ <sup>+</sup>* genetic background. (C-D) *lgl*; *hsr $\omega$ <sup>66/+</sup>* clones display increase in phospho-  
532 Histone (pH3, red, C) and MMP (red, D) levels. (E-F) Stereo microscope images of larvae  
533 bearing *lgl*; *hsr $\omega$ <sup>66/+</sup>* clones (GFP). \* in E and F indicate the GFP marked *lgl*; *hsr $\omega$ <sup>66/+</sup>*  
534 clones in the imaginal discs while arrows mark GFP cells away from the imaginal discs. F'  
535 displays a magnified view of the area marked by box in F. Anterior of the larva is to the top.  
536 (G) Schema displaying fate of *lgl* clones generated in *hsr $\omega$ <sup>+</sup>/hsr $\omega$ <sup>+</sup>* (WT, left) and those in  
537 *hsr $\omega$ <sup>66/+</sup>* genetic background.

538

539 **Figure 3. Cell autonomous perturbation in *hsr $\omega$*  activity results in transformation of *lgl***  
540 **somatic clones.** (A) *lgl* clones with down-regulated *hsr $\omega$*  (*lgl UAS-hsr $\omega$  RNAi GFP*, green)  
541 display neoplastic transformation as seen by disrupted F-Actin (grey). Note the transformed  
542 clones display characteristic large, dispersed nuclei (arrow). (B) Box plot displaying  
543 significant increase in size of *lgl* clones upon down-regulation of *hsr $\omega$* . (C) Increased  
544 expression of *diap1-lacZ* (red,  $\beta$ -Gal) and (D) elevated levels of MMP (red, arrow) in *lgl*  
545 *UAS-hsr $\omega$  RNAi* clones. (E) *lgl* clones with co-down-regulation of ISWI (*lgl UAS-ISWI RNAi*  
546 *UAS-GFP*) undergo neoplastic transformation, as seen by disrupted F-Actin (grey, arrow). (F)  
547 Schema displaying fate of *lgl* clones upon cell autonomous down-regulation of *hsr $\omega$* . (G) *lgl*  
548 clones that over-express *hsr $\omega$*  (*lgl UAS-hsr $\omega$  UAS-GFP*) display large dispersed nuclei  
549 (arrow, magnified box) and disruption of cytoarchitecture (grey, also see x-z section in the  
550 right most panel). (H) Box plot displaying significant increase in size of *lgl UAS-hsr $\omega$*   
551 somatic clones compared to *lgl* clones generated in *hsr $\omega$ <sup>+</sup>* genetic background. (I) Schema  
552 displaying fate of *lgl* clones generated in *hsr $\omega$ <sup>+</sup>* genetic background or upon cell autonomous  
553 gain of *hsr $\omega$* . Scale bars 100  $\mu$ m.

554

555 **Figure 4. Perturbations in *hsr $\omega$*  fail to rescue the *lgl* clones in distal wing.** (A-C) Cell  
556 death in distal wing pouch (white arrows) displayed by elevated levels of Caspase in *lgl UAS-*  
557 *hsr $\omega$  RNAi UAS-GFP* (A), *lgl UAS-hsr $\omega$  UAS-GFP* (B) and *lgl UAS-GFP* clones in *hsr $\omega$ <sup>66/+</sup>*  
558 background (C). (D) Schematic representation highlighting fate of *lgl* clones with perturbed  
559 *hsr $\omega$*  activity in the distal and proximal wing. (E-H) Increased staining for MitoTracker (E,  
560 F), and LysoTracker (H) in distal *lgl* clones with down-regulation of *hsr $\omega$*  (F, H), or in  
561 *hsr $\omega$ <sup>66/+</sup>* genetic background (E). (G) *lgl; hsr $\omega$ <sup>66/+</sup> UAS-GFP* clones in the wing pouch  
562 display non-uniform lipid droplets (Nile red, red, arrow). (I-J) High levels of cell death  
563 (Caspase, red) seen along clone boundaries (white arrows) in *lgl; hsr $\omega$ <sup>66/+</sup>UAS-GFP* (I) and  
564 *lgl UAS-hsr $\omega$  RNAi UAS-GFP* (J) clones. Yellow arrow in (J) marks a distal clone  
565 undergoing cell death. Scale bars 100  $\mu$ m.

566

567 **Figure 5. Perturbations in transcript levels of genes upon loss or gain of *hsr $\omega$*  activity**  
568 (A-C) Heatmaps depicting fold changes in expression of genes in larval eye epithelium upon  
569 gain or loss of *hsr $\omega$* , such as those associated with Cell death (A) Stress response (B) and  
570 Hippo pathway (C), as determined from RNAseq data [47]. (D) Gene Set Enrichment

571 Analysis (GSEA) depicting down-regulation of hnRNP-interacting genes in larval eye  
572 epithelium upon loss (top panel) or gain (lower panel) of *hsr $\omega$* , as determined from RNAseq  
573 data [47].

574

575 **Figure 6. Downregulation of sat III renders cancer cells more susceptible to cytotoxic**  
576 **cell death.** (A) Q-PCR data showing sat III expression in Prostate (22RV1, PC3, VCaP,  
577 LNCaP), Breast (MCF7, MDA-MB-231), and Cervical (HeLa) cancer cell lines. (B-D)  
578 Elevated levels of sat III RNA, as determined by Q-PCR, in HeLa (B), MDA-MB-231 (C)  
579 and PC3 (D) cells, under conditions of heat shock (42°C for 1 hour, left columns, HS),  
580 Doxorubicin (2.5 $\mu$ M, middle columns, Doxo) and Hydrogen peroxide (250 $\mu$ M, right  
581 columns, H<sub>2</sub>O<sub>2</sub>) treatment. (E-I) Confocal mages of MDA-MB-231 cells upon shock (42°C  
582 for 1 hour) showing features associated with cellular stress such as increased ROS (E),  
583 activated mitochondria, MitoTracker (F), elevated acidic lysosomes, LysoTracker (G),  
584 phosphorylated JNK levels (H) and elevated cell death, Caspase (I), when compared with  
585 controls in the absence of heat shock (compare with Figure S4). (J) Decrease in cell viability  
586 following Doxorubicin (Doxo, 5.0 $\mu$ M) treatment of PC3 cells compared to those treated with  
587 DMSO. Transfection with anti-sense sat III oligos (red bars) further reduces cell viability of  
588 Doxo treated cells but without any effect on DMSO treated cells; blue bars (CTL) represent  
589 cells not transfected with anti-sense sat III oligos. Error bars represent mean  $\pm$  SEM.  
590 \*\*P<0.001, \*P<0.05 for two-way ANOVA. Scale bar 100 $\mu$ m.

591

592 **Figure 7. lncRNA *hsr $\omega$*  gene defines a novel genetic modifier of ITS, perturbations in**  
593 **which drives neoplastic transformation of oncogenically mutant cells in *Drosophila*.**  
594 Schema representing inhibition of intrinsic tumor suppression-mediated cell death of  
595 oncogenically mutant cells in *Drosophila* epithelium. Perturbations in *hsr $\omega$*  lncRNA levels  
596 inhibit JNK signaling-driven cell death of oncogenic mutant cells, which eventually undergo  
597 neoplastic transformation.

598

599 **Figure S1. JNK-dependent cell stress in *lgl* clones** (A) *lgl UAS-GFP* clones (green) display  
600 elevated levels of acidic lysosomes as detected using LysoTracker (Red). (B-C) *lgl* clones  
601 with gain of a dominant negative form of *Drosophila* JNK (*lgl UAS-bsk<sup>DN</sup> UAS-GFP*, green)  
602 do not display elevated acidic lysosomes (LysoTracker, red, B) and survive in both distal

603 (white dotted lines) and proximal wing domains. (D) Stereo microscope image of a larva  
604 bearing *lgl; hsrw*<sup>66/+</sup> clones (GFP). \* marks the clones in the imaginal discs and arrows mark  
605 GFP cells away from the imaginal discs. Scale bar 100  $\mu$ m.

606

607 **Figure S2. *lgl* clones with gain of *hsrw* activity undergo neoplastic transformation (A)**  
608 *lgl EP3037 UAS-GFP* clones (green) are larger than *lgl* clones (compare with Figure 1D) and  
609 display neoplastic transformation as seen by disrupted F-Actin (grey). Scale bar 100  $\mu$ m.

610

611 **Figure S3. *hsrw* mutants display perturbations in JNK and stress-response pathways**

612 (A) Heatmap displaying expression level of 265 genes that were commonly up or  
613 downregulated upon gain or loss of *hsrw* as determined by [47]. (B-C) Gene Set Enrichment  
614 Analysis (GSEA) [52], displaying common downregulation of genes interacting with  
615 hnRNPs like Hrp38 and Hrp59 in larval eye epithelium with loss (B) or gain (C) of *hsrw* as  
616 seen in the RNAseq profiles published by [38]. The x-axis represents ranked gene list in  
617 descending order of expression (red is high, blue is low). Black bars mark the position of  
618 genes being queried. (D) Heat map displaying expression level of genes interacting with one  
619 or more hnRNPs (noted on right), upon gain or loss of *hsrw* as determined by Ray et. al. [47].

620

621 **Figure S4: Cellular stress in control Breast cancer line in absence of heat shock. (A-E)**

622 Phase contrast images of Control (absence of heat shock) MDA-MB-231 breast cancer cells  
623 exhibiting basal level of cellular stress: ROS, detected using DHE, ROS-sensitive fluorescent  
624 dye (Red, A), mitochondrial activity (MitoTracker, Red, B), acidic lysosomes (LysoTracker,  
625 red, C), pJNK (red, D) and Caspase (red, E). (F) Decrease in levels of *sat III*, as determined  
626 by Q-PCR, in Doxorubicin (5.0 $\mu$ M) treated PC3 cells in control and Sat III anti-sense treated  
627 Oligos. Error bars represent mean  $\pm$  SEM. \*\*P<0.001 for two-way ANOVA. Scale bar  
628 100 $\mu$ m.

629

## 630 REFERENCES

631 1 Klein G. Toward a genetics of cancer resistance. *Proceedings of the National Academy of*  
632 *Sciences* 2009; 106: 859-863.

- 633 2 Lowe SW, Cepero E, Evan G. Intrinsic tumour suppression. *Nature* 2004; 432: 307-315.
- 634 3 Tanimura N, Fujita Y. Epithelial defense against cancer (EDAC). *Seminars in cancer biology*,  
635 2020, pp 44-48.
- 636 4 Vishwakarma M, Piddini E. Outcompeting cancer. *Nature Reviews Cancer* 2020; 20: 187-198.
- 637 5 Igaki T, Pastor-Pareja JC, Aonuma H, Miura M, Xu T. Intrinsic tumor suppression and  
638 epithelial maintenance by endocytic activation of Eiger/TNF signaling in *Drosophila*.  
639 *Developmental cell* 2009; 16: 458-465.
- 640 6 Agrawal N, Kango M, Mishra A, Sinha P. Neoplastic transformation and aberrant cell-cell  
641 interactions in genetic mosaics of lethal(2)giant larvae (lgl), a tumor suppressor gene of  
642 *Drosophila*. *Dev Biol* 1995; 172: 218-229.
- 643 7 Guha M, Plescia J, Leav I, Li J, Languino LR, Altieri DC. Endogenous tumor suppression  
644 mediated by PTEN involves survivin gene silencing. *Cancer research* 2009; 69: 4954-4958.
- 645 8 Evan GI, Wyllie AH, Gilbert CS, Littlewood TD, Land H, Brooks M *et al*. Induction of apoptosis  
646 in fibroblasts by c-myc protein. *Cell* 1992; 69: 119-128.
- 647 9 Carneiro BA, El-Deiry WS. Targeting apoptosis in cancer therapy. *Nature Reviews Clinical  
648 Oncology* 2020; 17: 395-417.
- 649 10 Khan SJ, Bajpai A, Alam MA, Gupta RP, Harsh S, Pandey RK *et al*. Epithelial neoplasia in  
650 *Drosophila* entails switch to primitive cell states. *Proc Natl Acad Sci U S A* 2013; 110: E2163-  
651 2172.
- 652 11 Froidi F, Ziosi M, Garoia F, Pession A, Grzeschik NA, Bellosta P *et al*. The lethal giant larvae  
653 tumour suppressor mutation requires dMyc oncoprotein to promote clonal malignancy.  
654 *BMC Biol* 2010; 8: 33.
- 655 12 La Marca JE, Richardson HE. Two-faced: roles of JNK signalling during tumorigenesis in the  
656 *Drosophila* model. *Frontiers in cell and developmental biology* 2020; 8: 42.
- 657 13 Pinal N, Calleja M, Morata G. Pro-apoptotic and pro-proliferation functions of the JNK  
658 pathway of *Drosophila*: roles in cell competition, tumorigenesis and regeneration. *Open  
659 biology* 2019; 9: 180256.
- 660 14 Nakamura M, Ohsawa S, Igaki T. Mitochondrial defects trigger proliferation of neighbouring  
661 cells via a senescence-associated secretory phenotype in *Drosophila*. *Nature  
662 communications* 2014; 5: 1-11.
- 663 15 Li M, Sun S, Priest J, Bi X, Fan Y. Characterization of TNF-induced cell death in *Drosophila*  
664 reveals caspase-and JNK-dependent necrosis and its role in tumor suppression. *Cell death &  
665 disease* 2019; 10: 1-14.
- 666 16 McCluggage F, Fox AH. Paraspeckle nuclear condensates: Global sensors of cell stress?  
667 *BioEssays : news and reviews in molecular, cellular and developmental biology* 2021:  
668 2000245.
- 669 17 Connerty P, Lock RB, de Bock CE. Long Non-coding RNAs: Major Regulators of Cell Stress in  
670 Cancer. *Frontiers in oncology (Review)* 2020; 10: 285.
- 671 18 Lakhotia SC, Mallick B, Roy J. Non-coding RNAs: ever-expanding diversity of types and  
672 functions. *RNA-based regulation in human health and disease* 2020: 5-57.



- 673 19 Huarte M. The emerging role of lncRNAs in cancer. *Nature medicine* 2015; 21: 1253-1261.
- 674 20 Ting DT, Lipson D, Paul S, Brannigan BW, Akhavanfard S, Coffman EJ *et al.* Aberrant  
675 overexpression of satellite repeats in pancreatic and other epithelial cancers. *Science* 2011;  
676 331: 593-596.
- 677 21 Kundu S, Ray M, Sharma A. Interplay between Genome organization and Epigenomic  
678 alterations of Pericentromeric DNA in Cancer. *Journal of Genetics and Genomics* 2021.
- 679 22 Lakhota SC. Forty years of the 93D puff of *Drosophila melanogaster*. *J Biosci* 2011; 36: 399-  
680 423.
- 681 23 Bendena WG, Ayme-Southgate A, Garbe JC, Pardue ML. Expression of heat-shock locus hsr-  
682 omega in nonstressed cells during development in *Drosophila melanogaster*. *Dev Biol* 1991;  
683 144: 65-77.
- 684 24 Mutsuddi M, Lakhota SC. Spatial expression of the hsr-omega (93D) gene in different tissues  
685 of *Drosophila melanogaster* and identification of promoter elements controlling its  
686 developmental expression. *Developmental genetics* 1995; 17: 303-311.
- 687 25 Lakhota SC, Rajendra TK, Prasanth KV. Developmental regulation and complex organization  
688 of the promoter of the non-coding hsr(omega) gene of *Drosophila melanogaster*. *J*  
689 *Biosciences* 2001; 26: 25-38.
- 690 26 Lakhota SC, Sharma A. RNA metabolism in situ at the 93D heat shock locus in polytene  
691 nuclei of *Drosophila melanogaster* after various treatments. *Chromosome research* 1995; 3:  
692 151-161.
- 693 27 Bendena WG, Garbe JC, Traverse KL, Lakhota SC, Pardue ML. Multiple inducers of the  
694 *Drosophila* heat shock locus 93D (hsr omega): inducer-specific patterns of the three  
695 transcripts. *The Journal of cell biology* 1989; 108: 2017-2028.
- 696 28 Mukherjee T, Lakhota S. Heat shock puff activity in salivary glands of *Drosophila*  
697 *melanogaster* larvae during recovery from anoxia at two different temperatures. *Indian*  
698 *Journal of Experimental Biology* 1982; 20: 437-439
- 699 29 Prasanth KV, Rajendra TK, Lal AK, Lakhota SC. Omega speckles - a novel class of nuclear  
700 speckles containing hnRNPs associated with noncoding hsr-omega RNA in *Drosophila*.  
701 *Journal of cell science* 2000; 113 Pt 19: 3485-3497.
- 702 30 Mallik M, Lakhota SC. Pleiotropic consequences of misexpression of the developmentally  
703 active and stress-inducible non-coding hsr-omega gene in *Drosophila*. *J Biosci* 2011; 36: 265-  
704 280.
- 705 31 Singh AK, Lakhota SC. Dynamics of hnRNPs and omega speckles in normal and heat shocked  
706 live cell nuclei of *Drosophila melanogaster*. *Chromosoma* 2015; 124: 367-383.
- 707 32 Mallik M, Lakhota SC. The developmentally active and stress-inducible noncoding hsr-omega  
708 gene is a novel regulator of apoptosis in *Drosophila*. *Genetics* 2009; 183: 831-852.
- 709 33 Jolly C, Lakhota SC. Human sat III and *Drosophila* hsr omega transcripts: a common  
710 paradigm for regulation of nuclear RNA processing in stressed cells. *Nucleic acids research*  
711 2006; 34: 5508-5514.



- 712 34 Chung C-Y, Berson A, Kennerdell JR, Sartoris A, Unger T, Porta S *et al.* Aberrant activation of  
713 non-coding RNA targets of transcriptional elongation complexes contributes to TDP-43  
714 toxicity. *Nature communications* 2018; 9: 1-13.
- 715
- 716 35 Owusu-Ansah E, Banerjee U. Reactive oxygen species prime *Drosophila* haematopoietic  
717 progenitors for differentiation. *Nature* 2009; 461: 537-541.
- 718 36 Vassella E, Straesser K, Boshart M. A mitochondrion-specific dye for multicolour fluorescent  
719 imaging of *Trypanosoma brucei*. *Molecular and biochemical parasitology* 1997; 90: 381-385.
- 720 37 Johnson TK, Cockerell FE, McKechnie SW. Transcripts from the *Drosophila* heat-shock gene  
721 *hsr-omega* influence rates of protein synthesis but hardly affect resistance to heat  
722 knockdown. *Molecular genetics and genomics* 2011; 285: 313-323.
- 723 38 Ray M, Acharya S, Shambhavi S, Lakhota SC. Over-expression of Hsp83 in grossly depleted  
724 *hsr-omega* lncRNA background causes synthetic lethality and I(2)gl phenocopy in *Drosophila*.  
725 *J Biosci* 2019; 44.
- 726 39 Lee T, Luo L. Mosaic analysis with a repressible cell marker (MARCM) for *Drosophila* neural  
727 development. *Trends in neurosciences* 2001; 24: 251-254.
- 728 40 Enomoto M, Igaki T. Src controls tumorigenesis via JNK-dependent regulation of the Hippo  
729 pathway in *Drosophila*. *EMBO reports* 2013; 14: 65-72.
- 730 41 Onorati MC, Lazzaro S, Mallik M, Ingrassia AM, Carreca AP, Singh AK *et al.* The ISWI  
731 chromatin remodeler organizes the *hsr-omega* ncRNA-containing omega speckle nuclear  
732 compartments. *PLoS Genet* 2011; 7: e1002096.
- 733 42 Zhu M, Xin T, Weng S, Gao Y, Zhang Y, Li Q *et al.* Activation of JNK signaling links Igl  
734 mutations to disruption of the cell polarity and epithelial organization in *Drosophila* imaginal  
735 discs. *Cell research* 2010; 20: 242-245.
- 736 43 Verma A. Role of stress-inducible *hsrw* gene in development, and molecular genetic  
737 characterization of its novel interactor, DNA pol- $\epsilon$ , in *Drosophila melanogaster*. PhD thesis,  
738 Banaras Hindu University, Varanasi, India, 2012.
- 739 44 Bajpai A, Sinha P. Hh signaling from de novo organizers drive Igl neoplasia in *Drosophila*  
740 epithelium. *Dev Biol* 2020; 457: 1-8.
- 741 45 Tamori Y, Suzuki E, Deng WM. Epithelial Tumors Originate in Tumor Hotspots, a Tissue-  
742 Intrinsic Microenvironment. *PLoS Biol* 2016; 14: e1002537.
- 743 46 Liu L, Zhang K, Sandoval H, Yamamoto S, Jaiswal M, Sanz E *et al.* Glial lipid droplets and ROS  
744 induced by mitochondrial defects promote neurodegeneration. *Cell* 2015; 160: 177-190.
- 745 47 Ray M, Singh G, Lakhota SC. Altered levels of *hsr-omega* lncRNAs further enhance Ras  
746 signaling during ectopically activated Ras induced R7 differentiation in *Drosophila*. *Gene*  
747 *expression patterns* 2019; 33: 20-36.
- 748 48 Lam D, Shah S, de Castro IP, Loh SH, Martins LM. *Drosophila* happyhour modulates JNK-  
749 dependent apoptosis. *Cell death & disease* 2010; 1: e66.

- 750 49 Brown KM, Day JP, Huston E, Zimmermann B, Hampel K, Christian F *et al.*  
751 Phosphodiesterase-8A binds to and regulates Raf-1 kinase. *Proc Natl Acad Sci U S A* 2013;  
752 110: E1533-1542.
- 753 50 Reiling JH, Hafen E. The hypoxia-induced paralogs Scylla and Charybdis inhibit growth by  
754 down-regulating S6K activity upstream of TSC in *Drosophila*. *Genes Dev* 2004; 18: 2879-2892.
- 755  
756 51 Misra JR, Irvine KD. The Hippo Signaling Network and Its Biological Functions. *Annual review*  
757 *of genetics* 2018; 52: 65-87.
- 758 52 Subramanian A, Tamayo P, Mootha VK, Mukherjee S, Ebert BL, Gillette MA *et al.* Gene set  
759 enrichment analysis: a knowledge-based approach for interpreting genome-wide expression  
760 profiles. *Proc Natl Acad Sci U S A* 2005; 102: 15545-15550.
- 761 53 Jolly C, Metz A, Govin J, Vigneron M, Turner BM, Khochbin S *et al.* Stress-induced  
762 transcription of satellite III repeats. *The Journal of cell biology* 2004; 164: 25-33.
- 763 54 Goenka A, Sengupta S, Pandey R, Parihar R, Mohanta GC, Mukerji M *et al.* Human satellite-III  
764 non-coding RNAs modulate heat-shock-induced transcriptional repression. *Journal of cell*  
765 *science* 2016; 129: 3541-3552.
- 766 55 Baumgartner ME, Dinan MP, Langton PF, Kucinski I, Piddini E. Proteotoxic stress is a driver of  
767 the loser status and cell competition. *Nature Cell Biology* 2021; 23: 136-146.
- 768 56 Kucinski I, Dinan M, Kolahgar G, Piddini E. Chronic activation of JNK JAK/STAT and oxidative  
769 stress signalling causes the loser cell status. *Nature communications* 2017; 8: 1-13.
- 770 57 Li HH, Du J, Fan YN, Zhang ML, Liu DP, Li L *et al.* The ubiquitin ligase MuRF1 protects against  
771 cardiac ischemia/reperfusion injury by its proteasome-dependent degradation of phospho-c-  
772 Jun. *The American journal of pathology* 2011; 178: 1043-1058.
- 773 58 Sarikas A, Hartmann T, Pan ZQ. The cullin protein family. *Genome biology* 2011; 12: 220.
- 774 59 Singh AK, Lakhota SC. The hnRNP A1 homolog Hrb87F/Hrp36 is important for telomere  
775 maintenance in *Drosophila melanogaster*. *Chromosoma* 2016; 125: 373-388.
- 776 60 Bhogal JK, Kanaskie JM, DiAngelo JR. The role of the heterogeneous nuclear  
777 ribonucleoprotein (hnRNP) Hrb27C in regulating lipid storage in the *Drosophila* fat body.  
778 *Biochemical and biophysical research communications* 2020; 524: 178-183.
- 779 61 Ji Y, Tulin AV. Poly(ADP-ribose) controls DE-cadherin-dependent stem cell maintenance and  
780 oocyte localization. *Nature communications* 2012; 3: 760.
- 781 62 Ferreira D, Meles S, Escudeiro A, Mendes-da-Silva A, Adegas F, Chaves R. Satellite non-coding  
782 RNAs: the emerging players in cells, cellular pathways and cancer. *Chromosome Research*  
783 2015; 23: 479-493.
- 784 63 Chatterjee M, Dass J FP, Sengupta S. Nuclear stress bodies: Interaction of its components in  
785 oncogenic regulation. *Journal of cellular biochemistry* 2019; 120: 14700-14710.
- 786 64 Portz B, Lee BL, Shorter J. FUS and TDP-43 phases in health and disease. *Trends in*  
787 *biochemical sciences* 2021.

- 788 65 Ke H, Zhao L, Feng X, Xu H, Zou L, Yang Q *et al.* NEAT1 is required for survival of breast  
789 cancer cells through FUS and miR-548. *Gene regulation and systems biology* 2016; 10: GRSB.  
790 S29414.
- 791 66 Zhu H, Zheng T, Yu J, Zhou L, Wang L. LncRNA XIST accelerates cervical cancer progression via  
792 upregulating Fus through competitively binding with miR-200a. *Biomedicine &*  
793 *Pharmacotherapy* 2018; 105: 789-797.
- 794 67 Babicki S, Arndt D, Marcu A, Liang Y, Grant JR, Maciejewski A *et al.* Heatmapper: web-  
795 enabled heat mapping for all. *Nucleic acids research* 2016; 44: W147-W153.

FIGURE 1

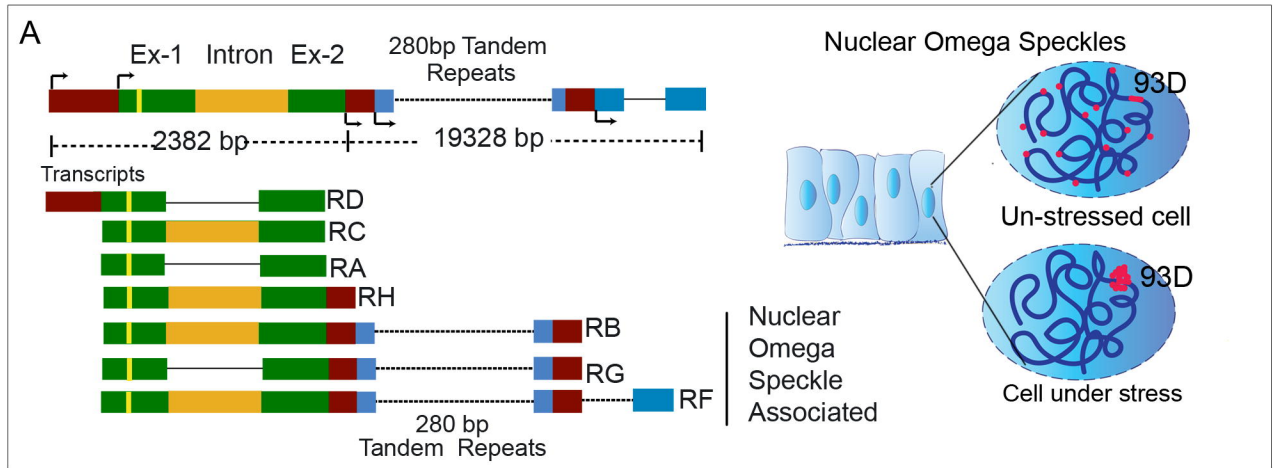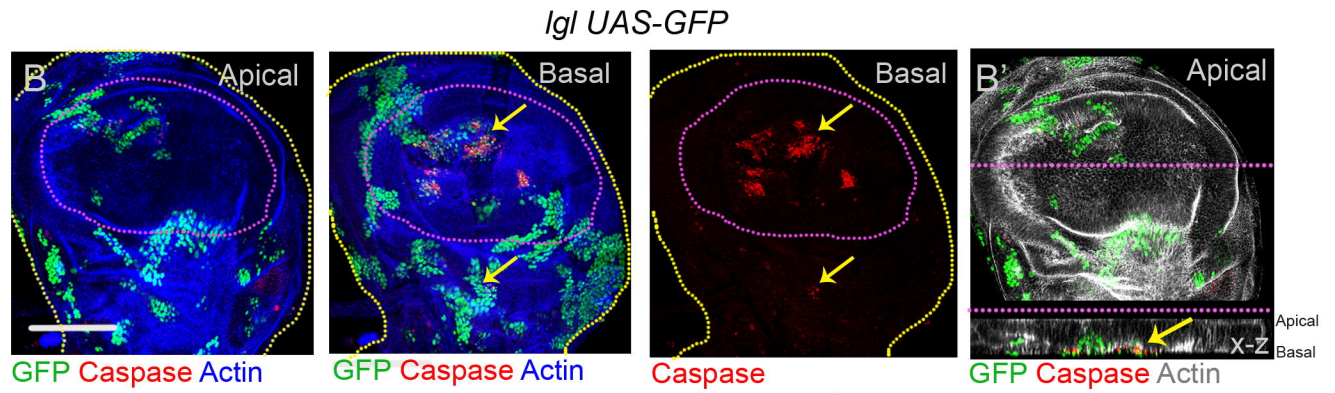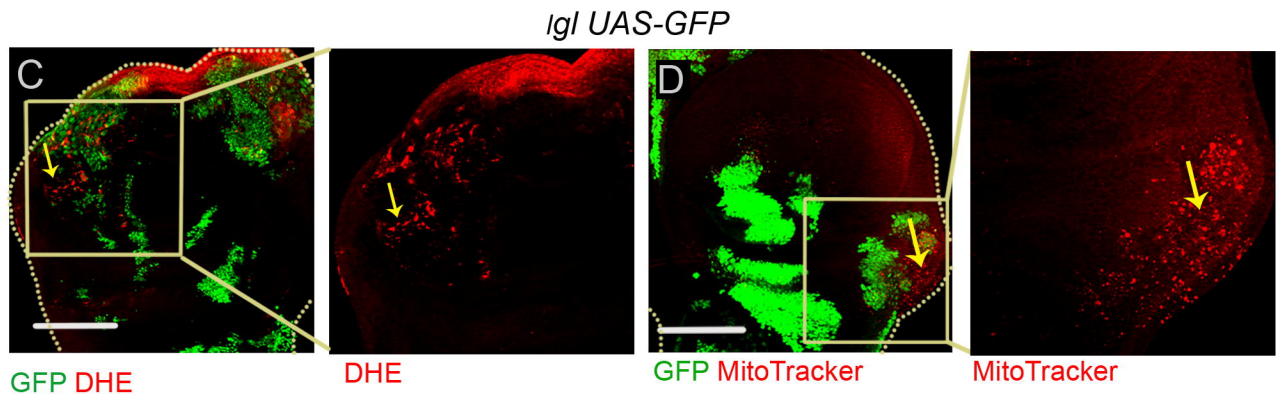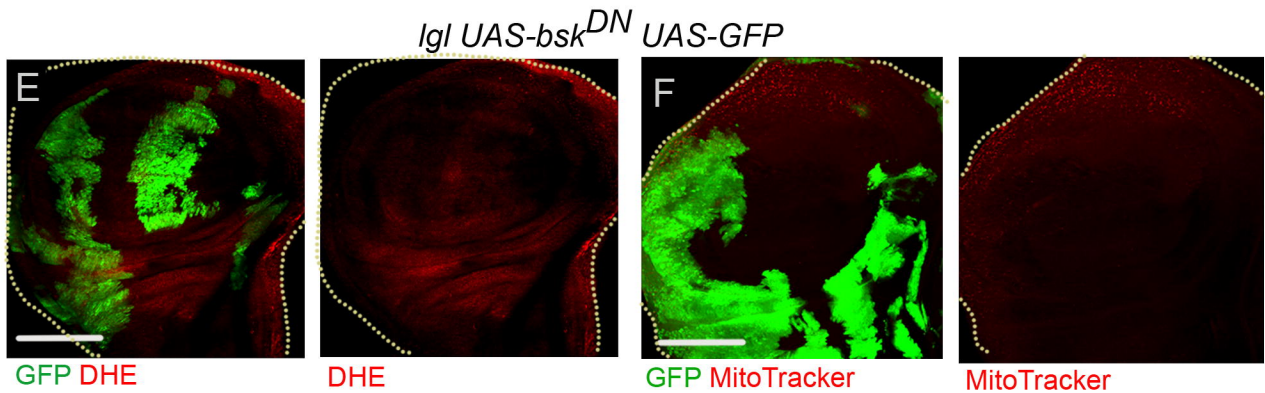



FIGURE 2

*Igl UAS-GFP; hsr $\omega$ <sup>66/+</sup>*

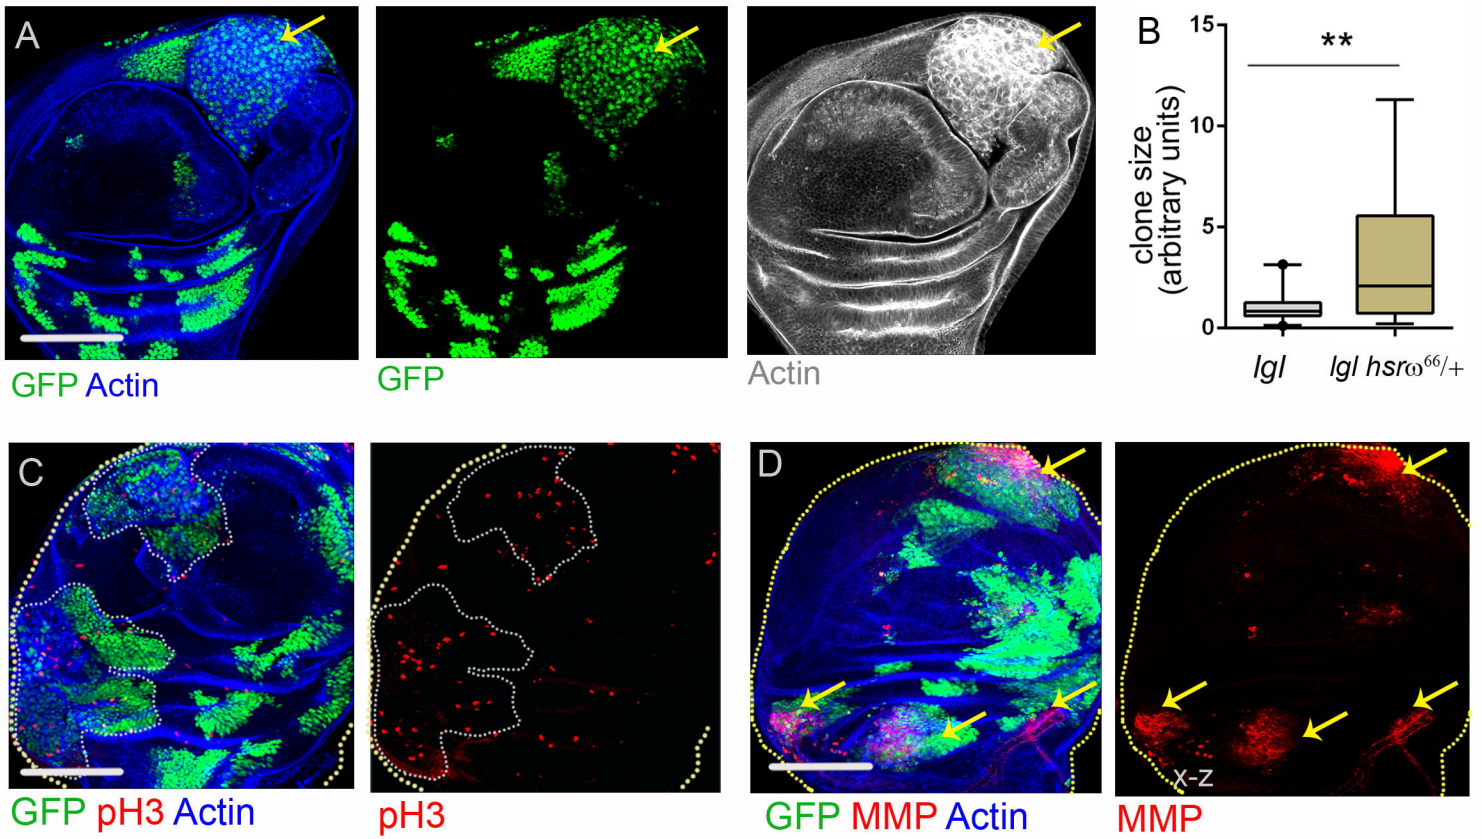

*Igl UAS-GFP; hsr $\omega$ <sup>66/+</sup>*

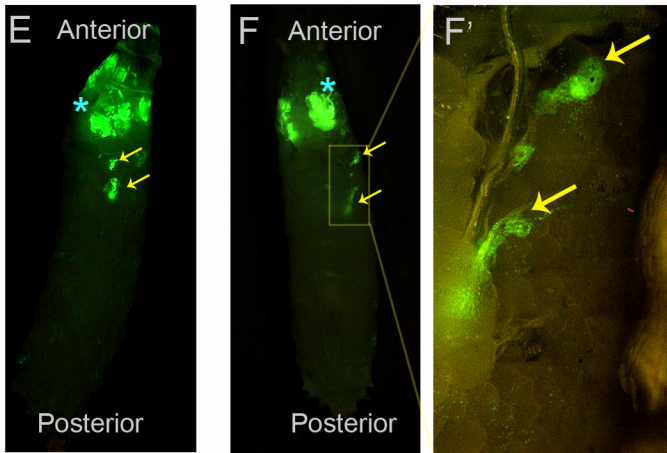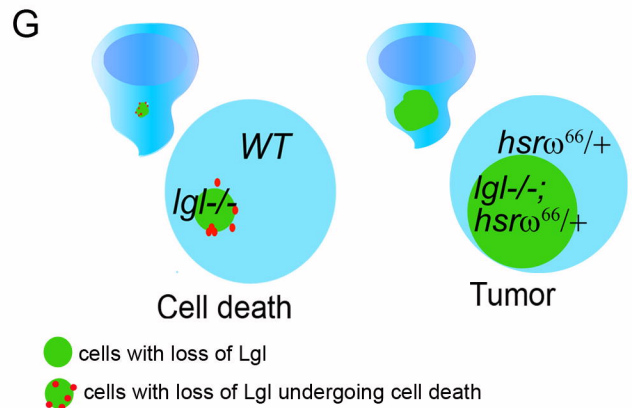

FIGURE 3

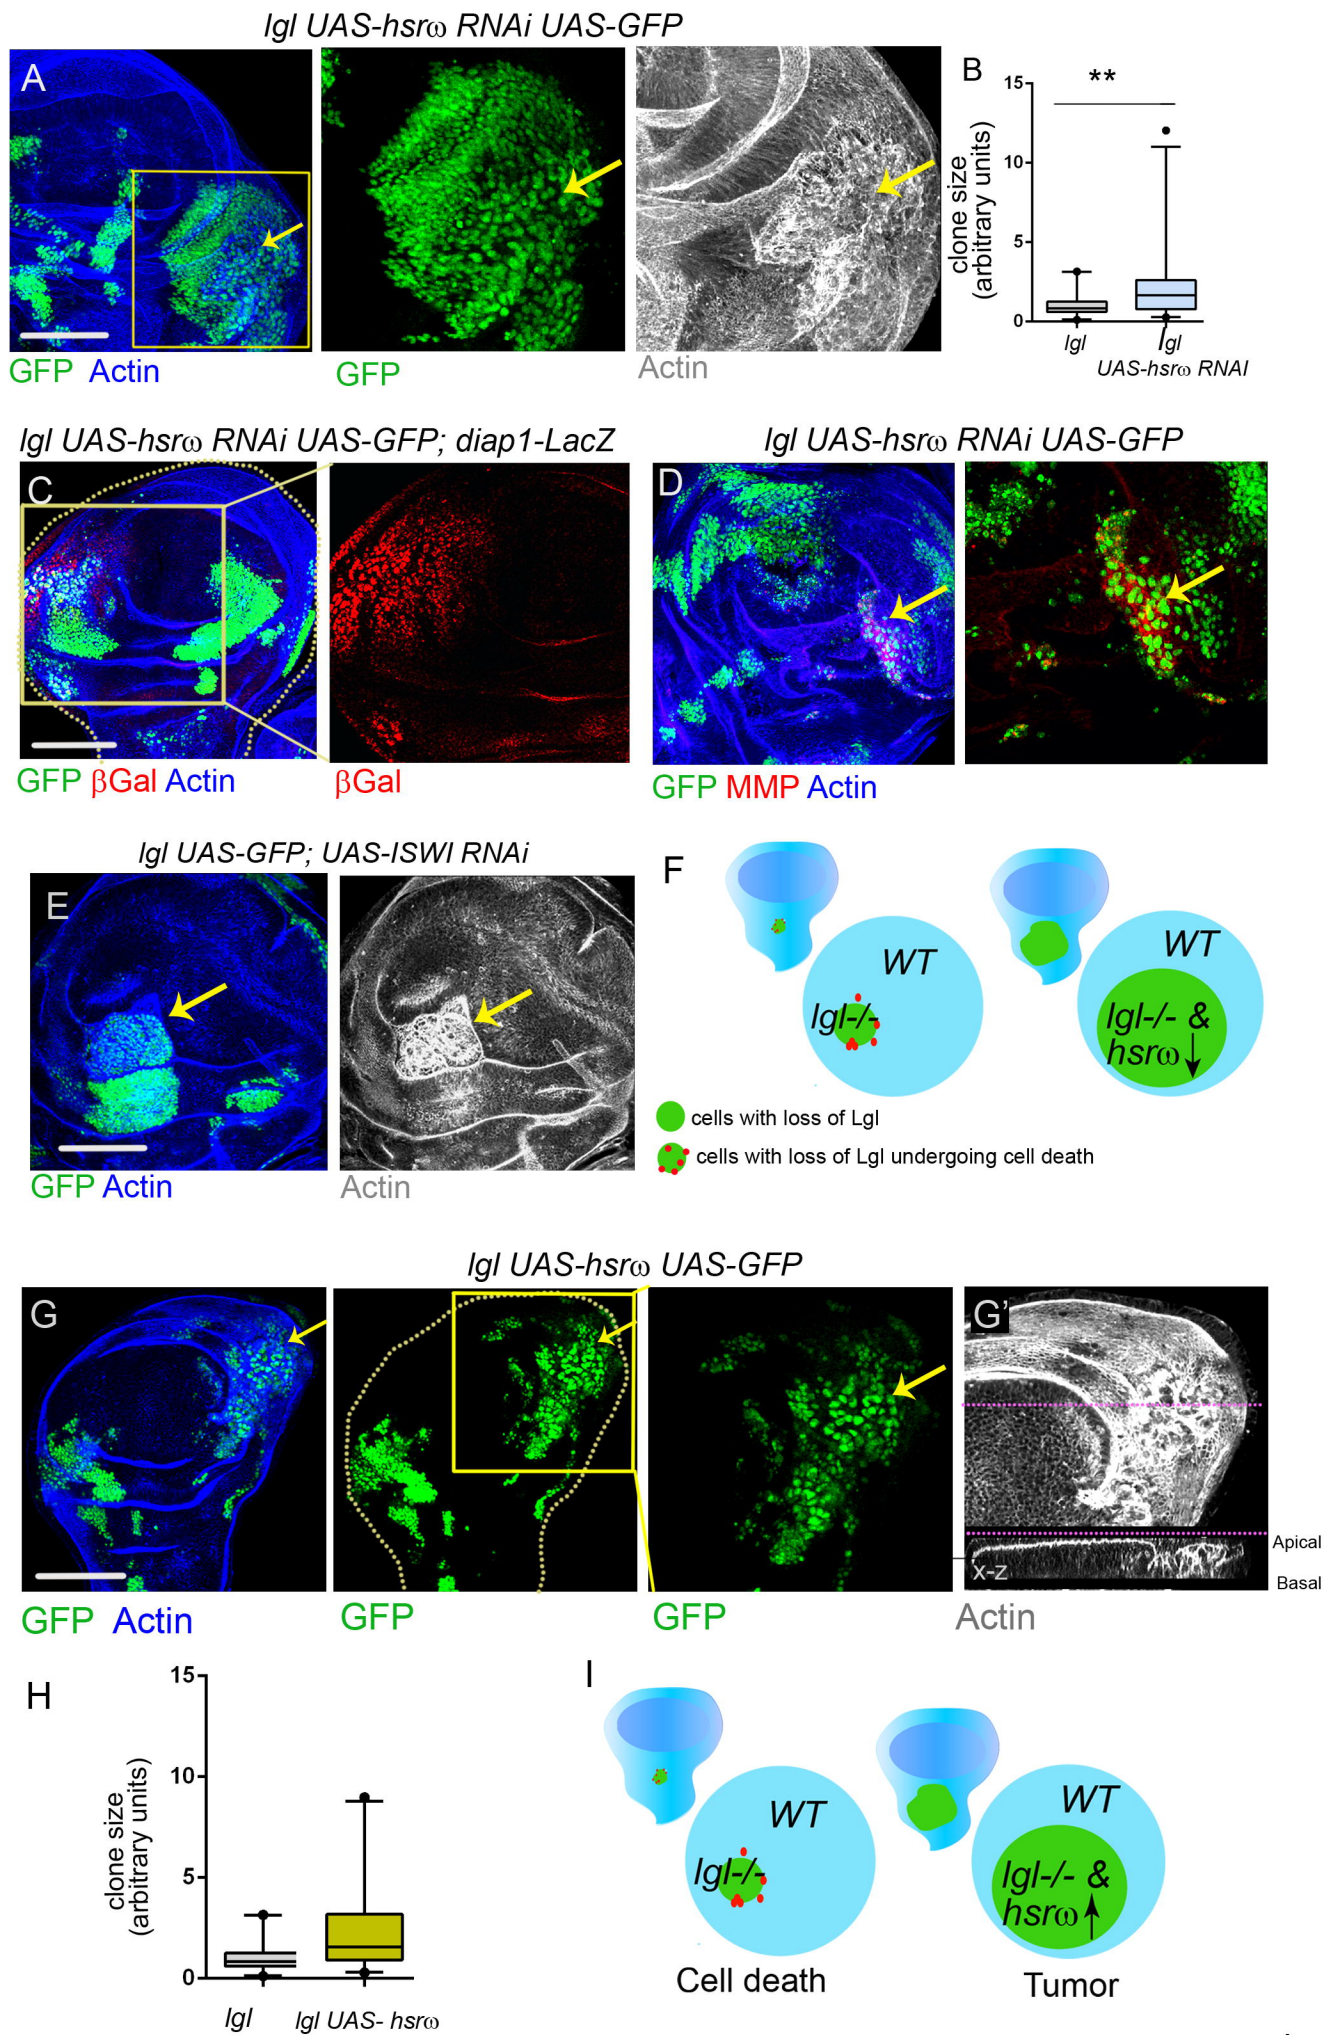



FIGURE 4

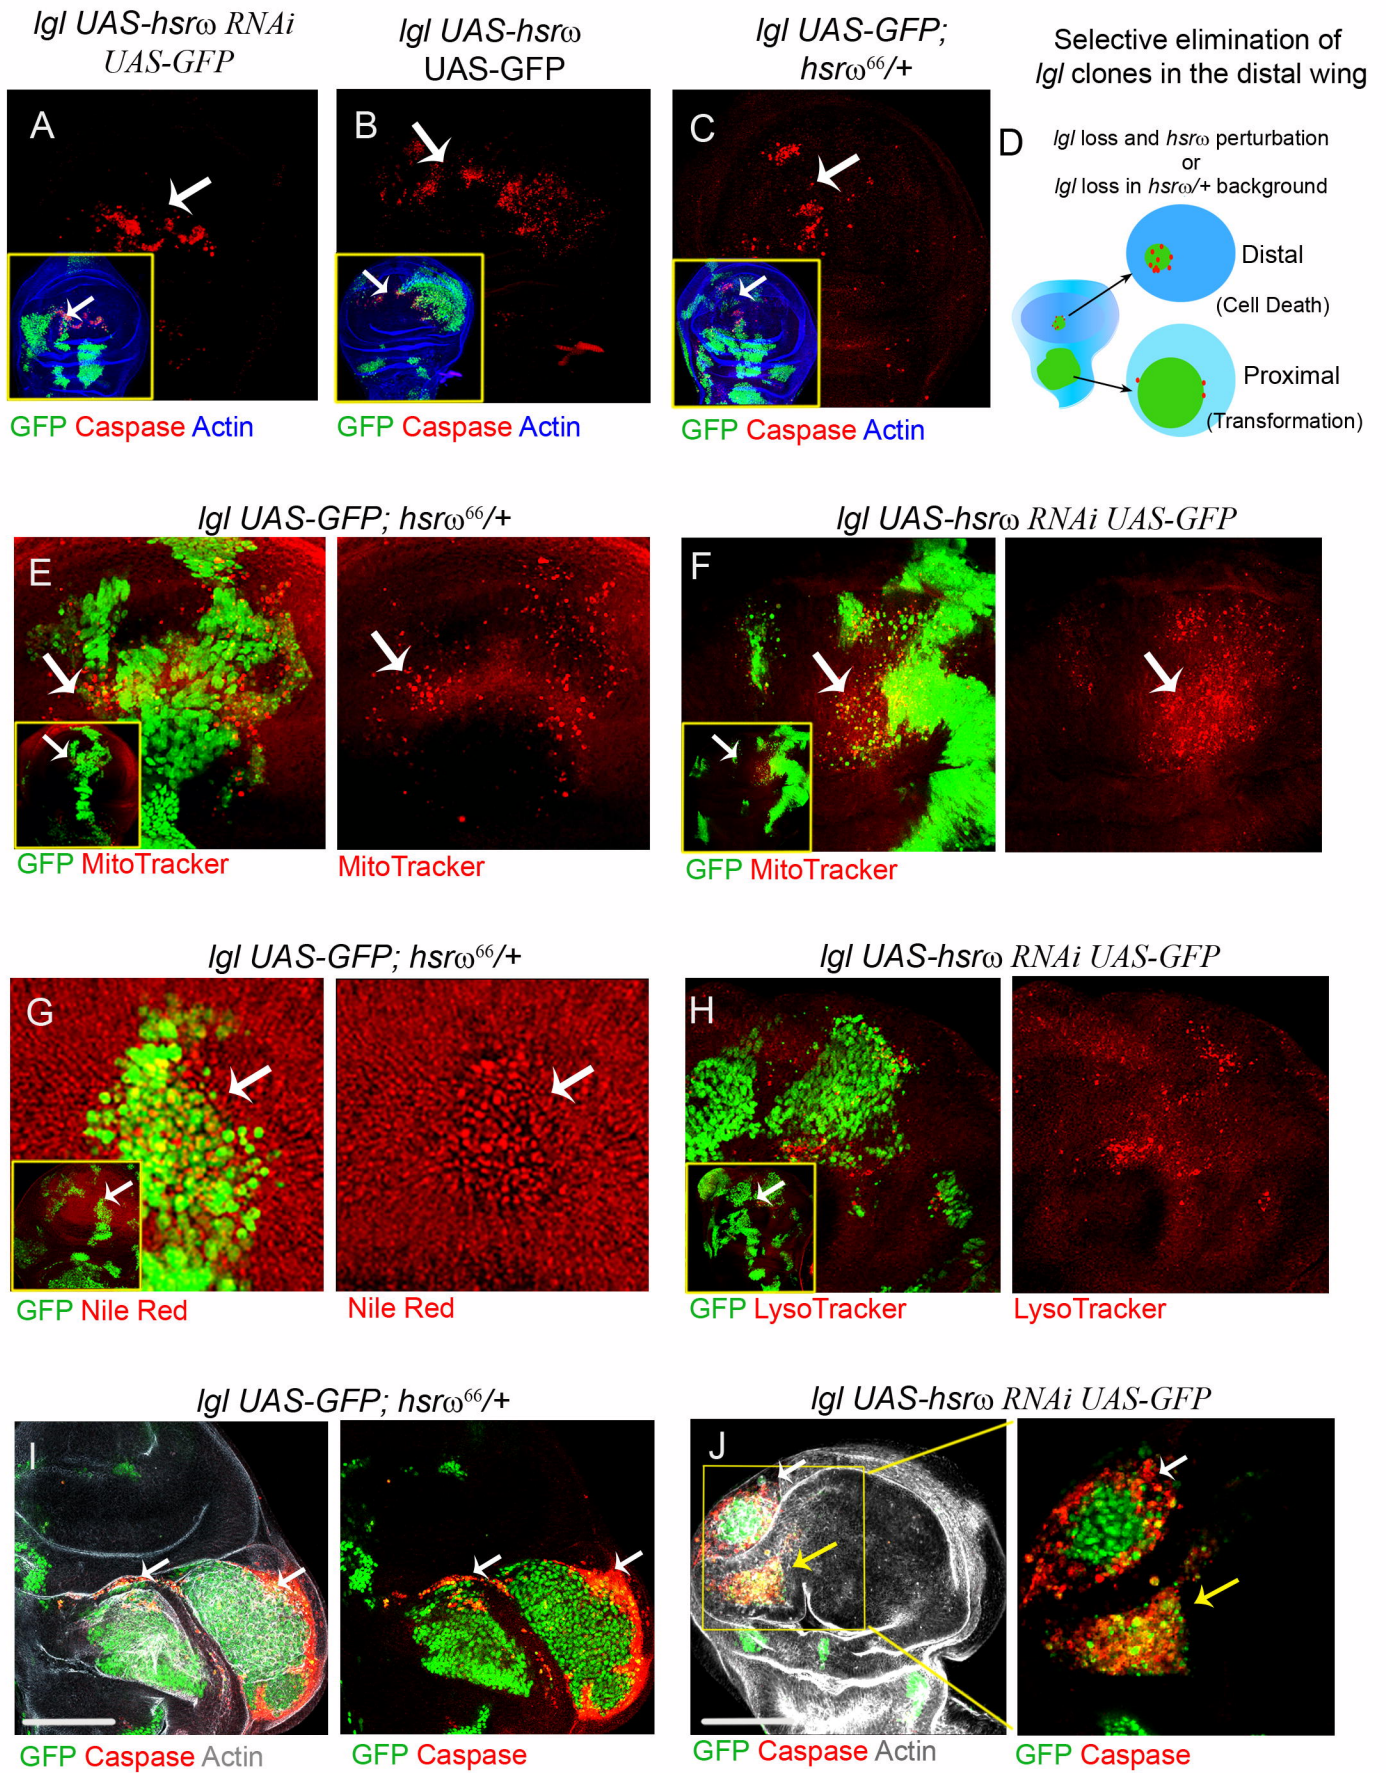



Figure 5

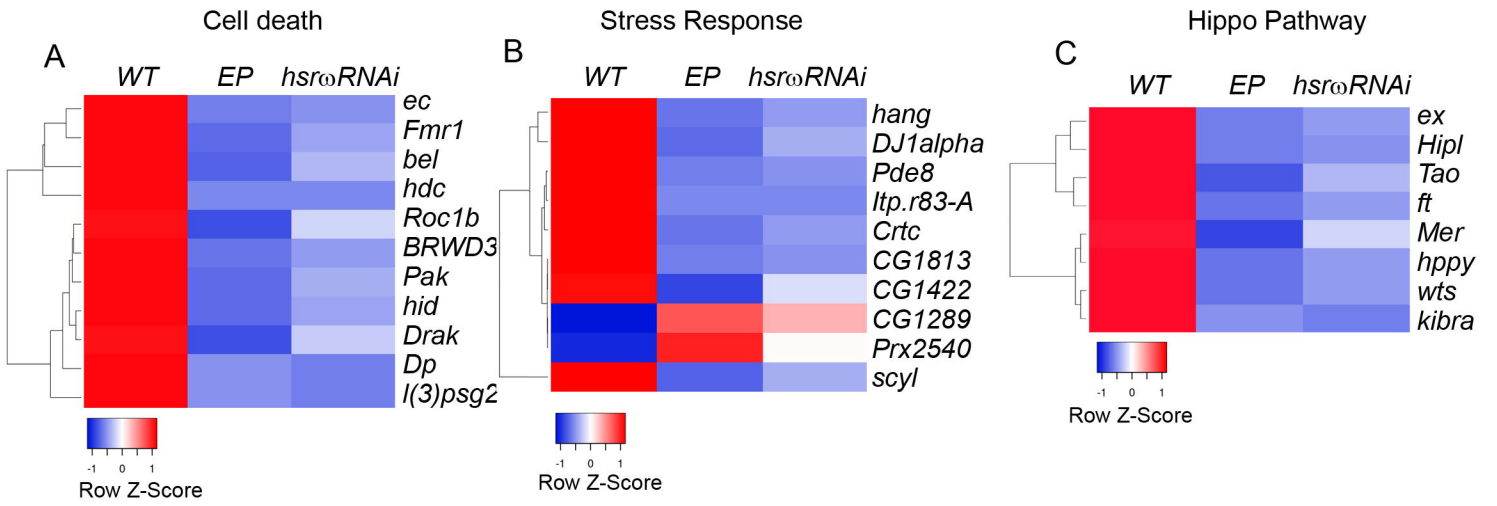

*hsr* $\omega$  RNAi vs WT

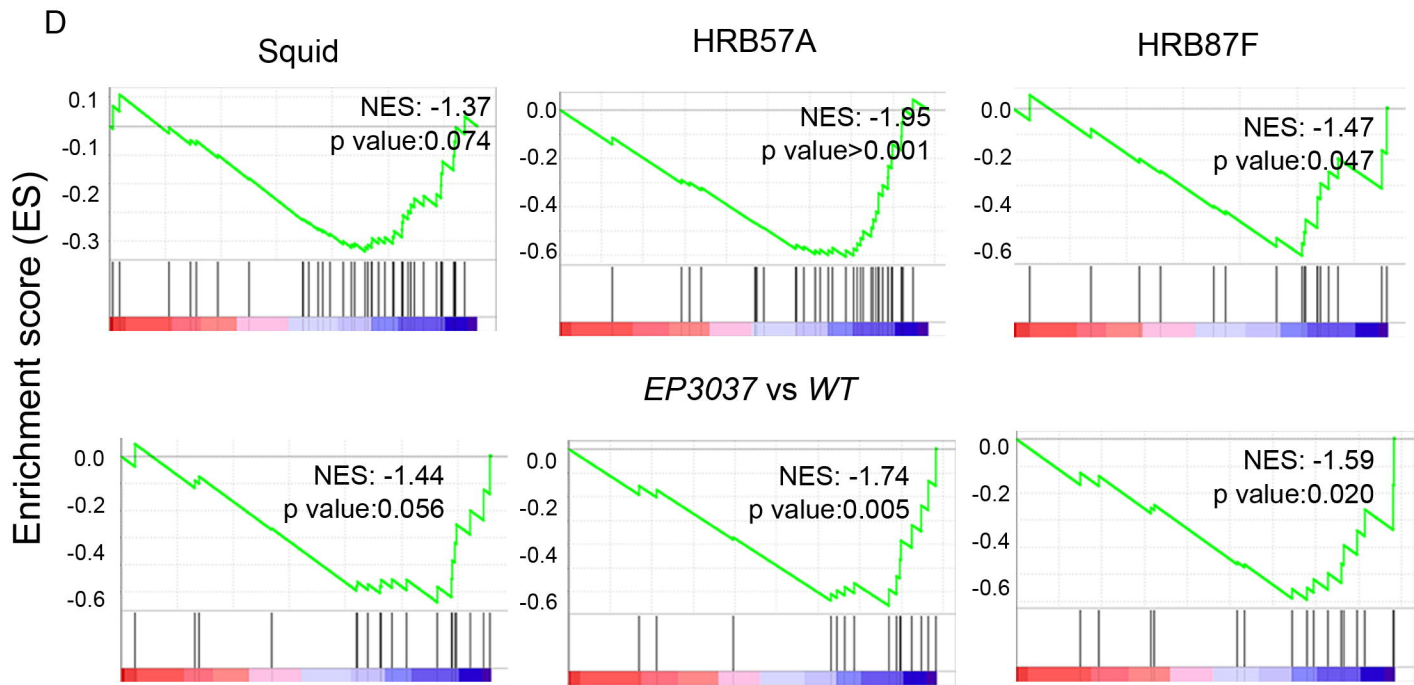

FIGURE 6

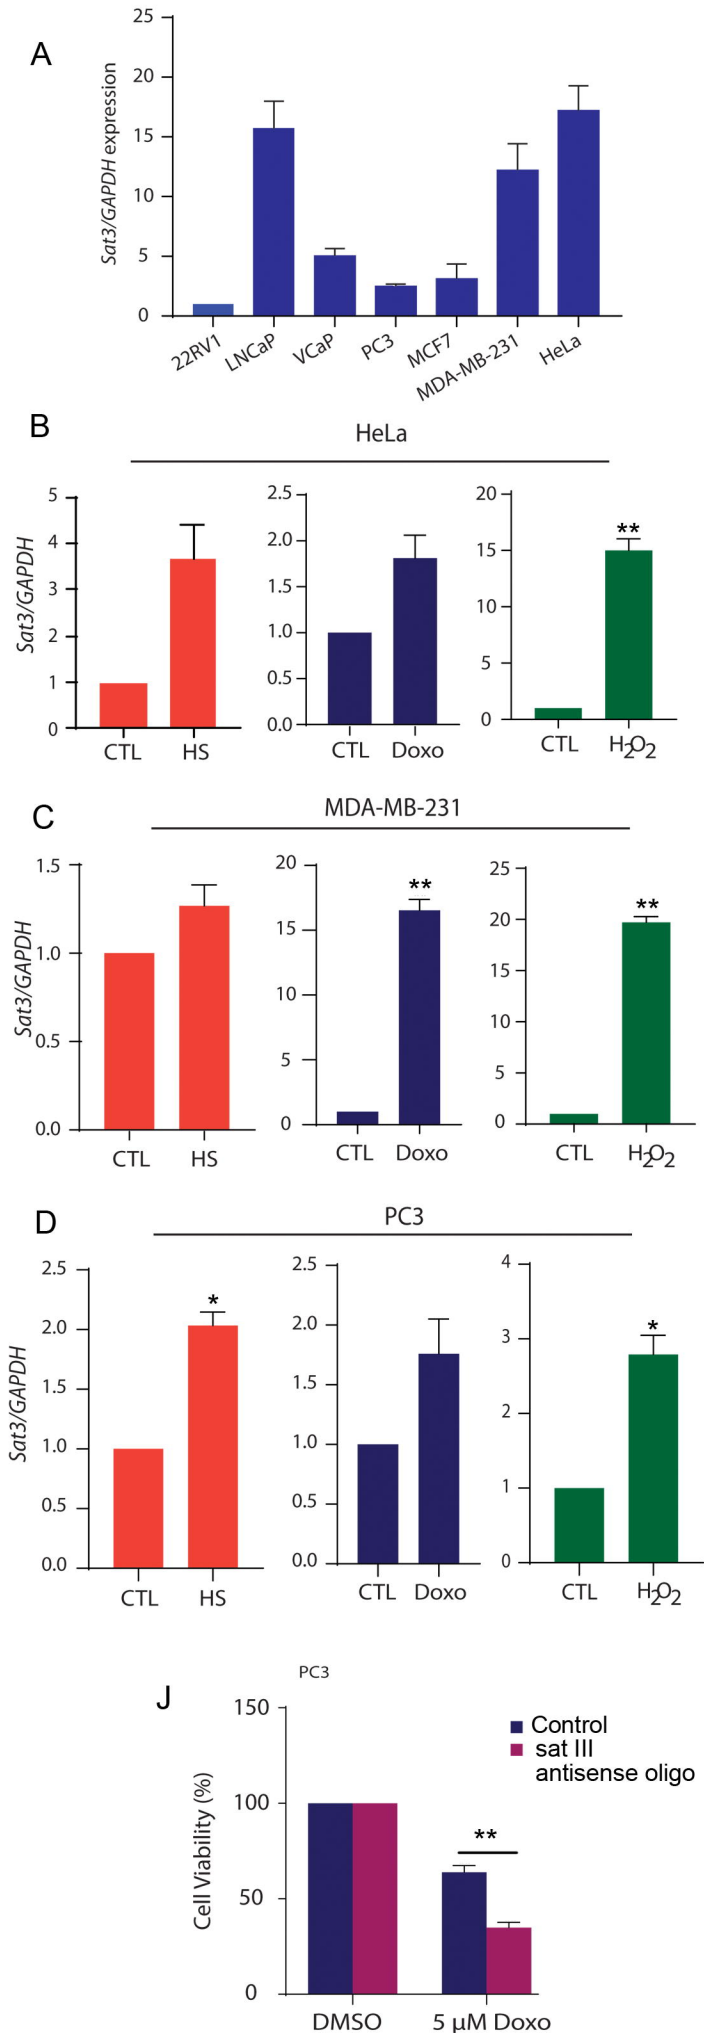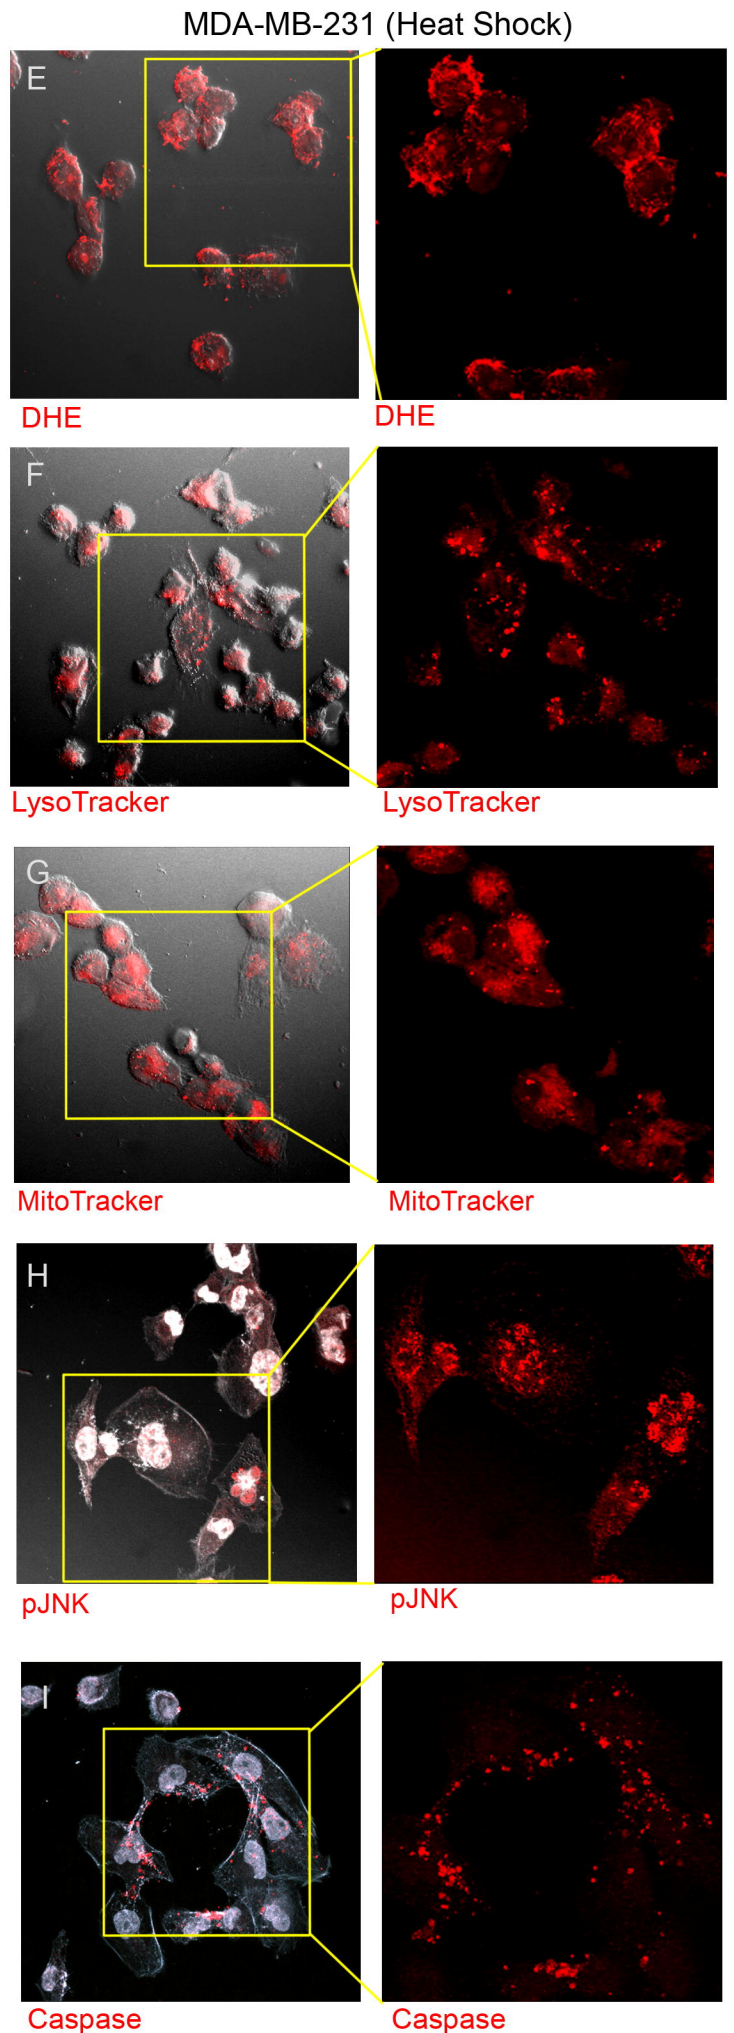

FIGURE 7

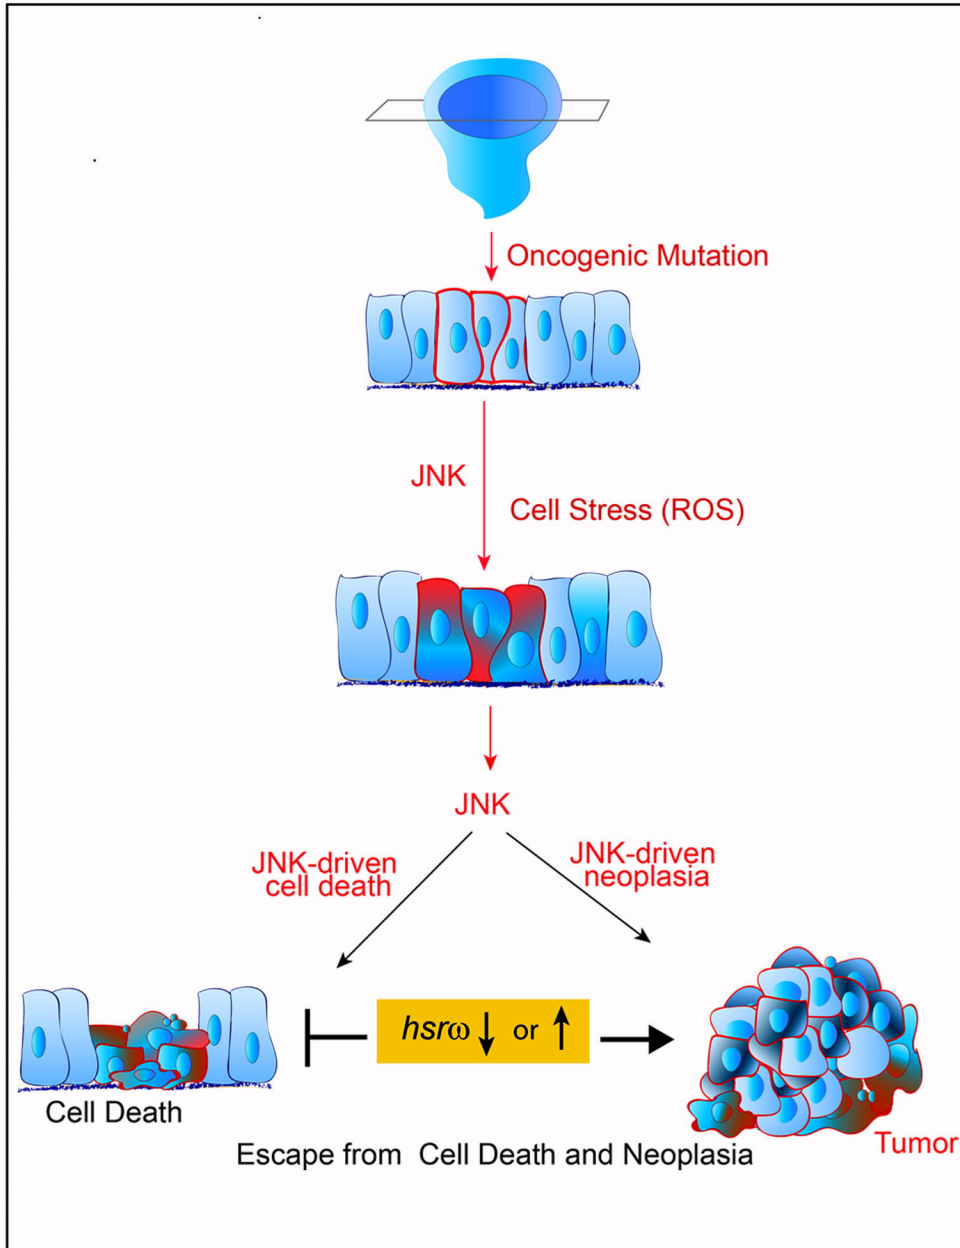



FIGURE S1

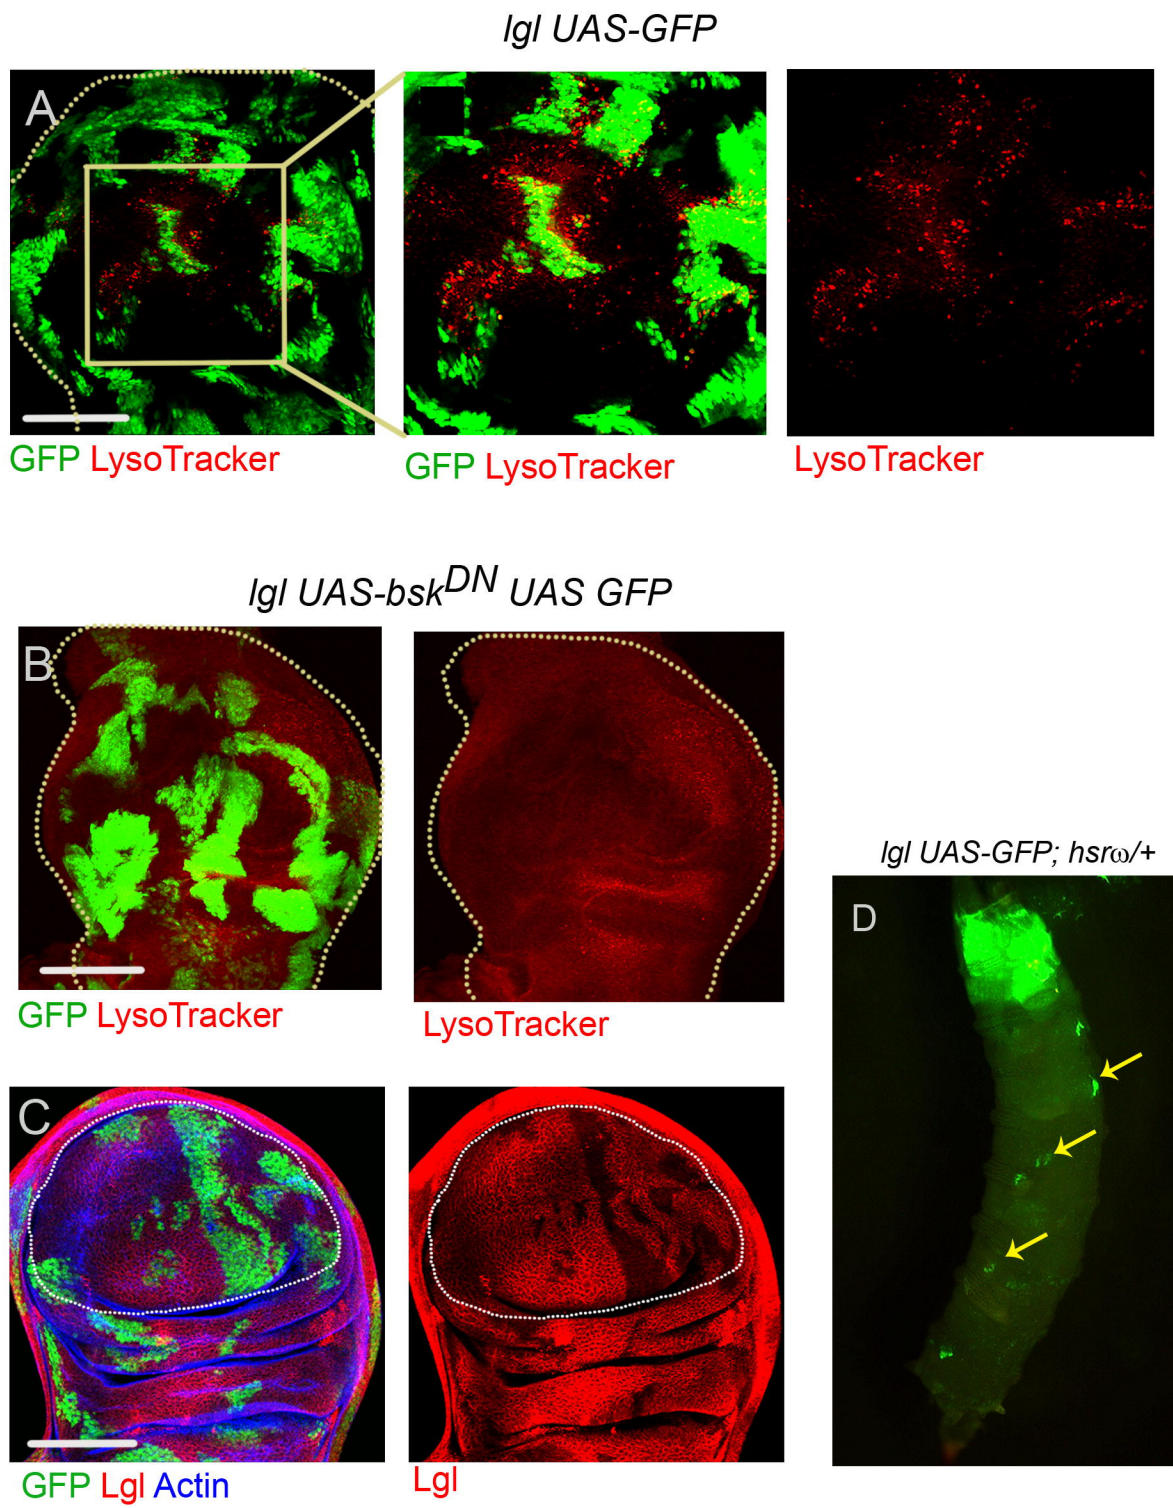

FIGURE S2

*Igl EP3037 UAS-GFP*

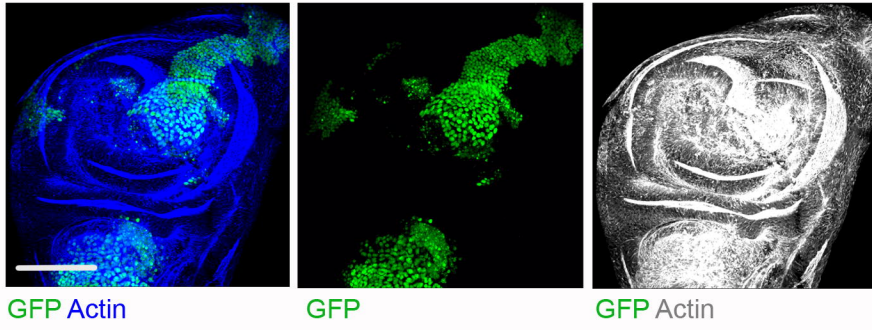

Figure S3

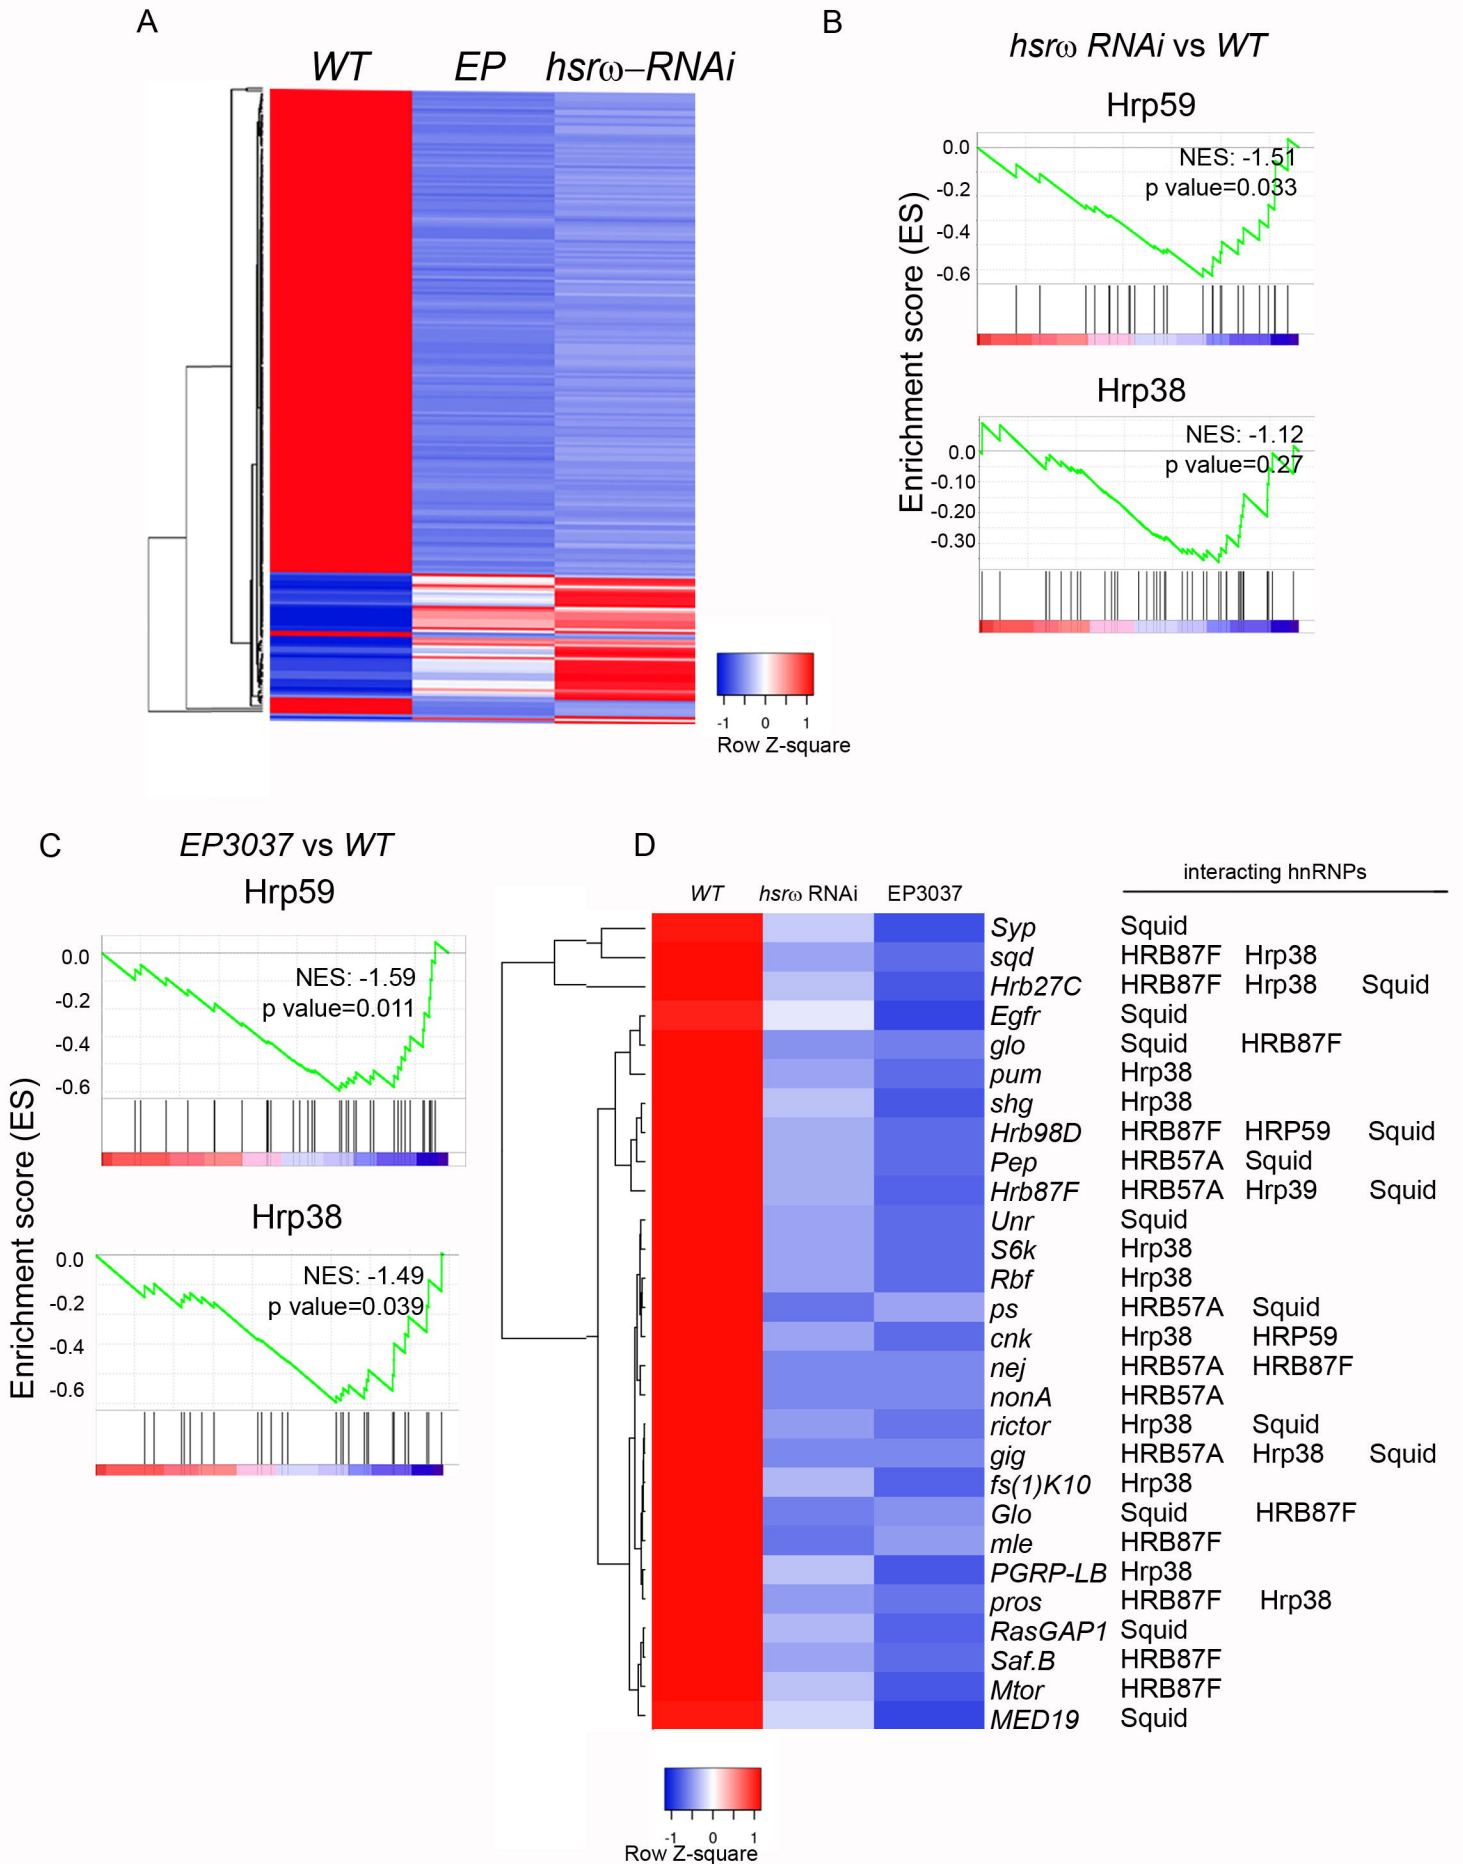



## FIGURE S4

### MDA-MB-231 (Control- without Heat Shock)

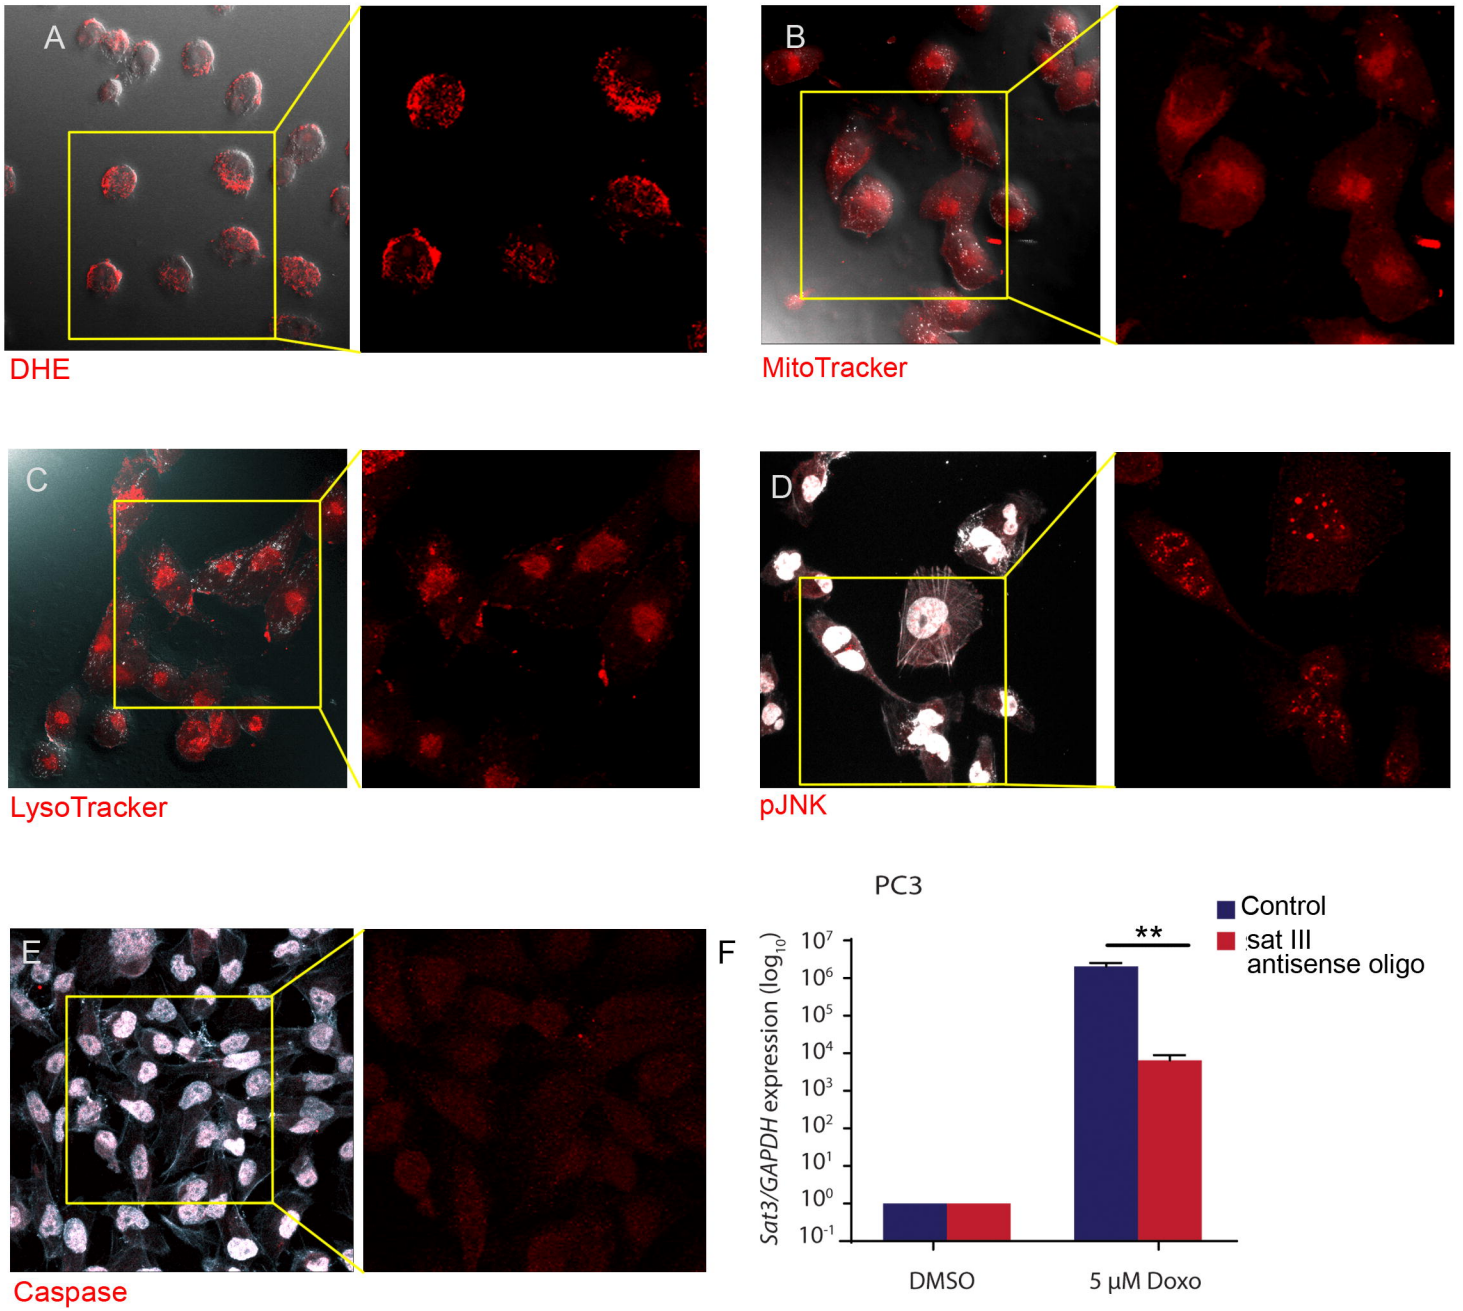

Source: http://biorxiv.org/content/10.1101/2021.04.26.441543v1.full.pdf
